# Supplementary material
Source: PubMed Central journal article supplement (PMC9798292)
Supplement: dyac029_supplementary_data.pdf [file dyac029_supplementary_data.pdf]

## Online-only Supplementary Data

### Association between low-density lipoprotein cholesterol and cardiovascular mortality in statin non-users: a prospective cohort study in 14.9 million Korean adults

**Sang-Wook Yi**, MD, PhD, Department of Preventive Medicine and Public Health, Catholic Kwandong University College of Medicine, Republic of Korea; **Sang Joon An**, MD, Department of Neurology, Catholic Kwandong University College of Medicine, International St. Mary's Hospital, Republic of Korea; **Hyung Bok Park**, MD, Department of Cardiology, Catholic Kwandong University College of Medicine, International St. Mary's Hospital; **Jee-Jeon Yi**, PhD, Institute for Occupational and Environmental Health, Catholic Kwandong University, Republic of Korea; **Heechoul Ohrr**, MD, PhD, Department of Preventive Medicine, Yonsei University College of Medicine, Republic of Korea;

Correspondence: Sang-Wook Yi, MD, PhD, Department of Preventive Medicine and Public Health, Catholic Kwandong University College of Medicine, Bumil-ro 579-beongil 24, Gangneung, Gangwon-do, 25601, Republic of Korea; Tel: +82-33-649-7468; Fax +82-33-641-1074. e-mail: [flyhigh@cku.ac.kr](mailto:flyhigh@cku.ac.kr)

**Supplementary material. Statistical analysis.**

**Figure S1. Study flow chart**

**Figure S2. Distribution of low density lipoprotein-cholesterol (LDL-C) concentration.**

**Figure S3. Mean and median concentrations of low-density lipoprotein cholesterol (LDL-C).**

**Figure S4. HRs across 17 categories of LDL-C for CVD mortality.**

**Figure S5. HRs across 11 categories of LDL-C for CVD mortality according to age.**

**Figure S6. HRs for mortality from CVD and its subtypes after exclusion of first 3 years of deaths.**

**Figure S7. HRs for mortality from CVD and its subtypes according to age.**

**Figure S8. HRs for mortality from cardiovascular disease (CVD) and its subtypes using spline analysis.**

**Figure S9. HRs across 6 categories of LDL-C for mortality from CVD and its subtypes according to sex.**

**Figure S10. HRs across 11 categories of LDL-C for mortality from CVD and its subtypes according to sex.**

**Figure S11. HRs across 17 categories of LDL-C for all-cause mortality.**

**Figure S12. HRs for mortality from CVD and its subtypes after further adjustment for anemia (sensitivity analysis)**

**Figure S13. HRs for mortality from CVD and its subtypes in individuals with triglyceride <200 mg/dL in which Friedewald measurements have a higher validity (sensitivity analysis)**

**Figure S14. HRs for CVD mortality by age in all participants and individuals with triglyceride <200 mg/dL (sensitivity analysis)**

**Table S1. Number of deaths from cardiovascular causes by sex**

**Table S2. Mean and median of LDL cholesterol (mg/dL) (Including numerical version of Figure 1).**

**Table S3. HRs for mortality from CVD and its subtypes across 11 LDL-C categories (Including numerical version of Figure 4).**

**Table S4. HRs per each 39 mg/dL (1 mmol/L) increase in LDL-C for deaths from CVD and subtypes according to LDL-C range and sex**

**Table S5. HRs per each 39 mg/dL (1 mmol/L) increase in LDL-C for deaths from CVD and subtypes according to LDL-C range and age**

**Table S6. HRs per each 39 mg/dL (1 mmol/L) increase in LDL-C for deaths from CVD and subtypes in the LDL-C range 130-300 mg/dL**

## Supplementary material. Statistical analysis

LDL-C levels were categorized into 17 groups (mg/dL; <50, 50-59 to 190-199 by 10, and  $\geq 200$  mg/dL 100-109 mg/dL as reference) for overall CVD mortality, and into 11 groups for subtypes of CVD (mg/dL; <55, 55-69 to 175-189 by 15, and  $\geq 190$  mg/dL 100-114 mg/dL as reference), and into 6 groups for age-specific analyses (<70, 70-99, 100-129 [reference], 130-159, 160-189, and  $\geq 190$  mg/dL). The LDL-C category with the lowest overall CVD mortality was used as the reference. Log risk was regressed on LDL-C as a continuous variable within the ranges of <100 mg/dL (termed “lower range”), 100-300 mg/dL (“upper range”), or  $\leq 300$  mg/dL, yielding HRs per 39 mg/dL (1 mmol/L) increase in LDL-C in each range. An analysis using a restricted cubic spline transformation of LDL-C with 5 (or 4) predefined knots (5th, 27.5th, 50th, 72.5th, and 95th percentile; or [5th, 35th, 65th, and 95th percentile]) was also performed to examine non-linear associations. P-values for non-linearity were assessed with the likelihood ratio test, in which the model with only the linear term was compared with the model with the cubic spline terms.

The hazard ratios (HRs) for mortality were calculated using Cox proportional hazard models stratified by baseline age (years: 18-24, 25-34, 35-44, 45-54, 55-64, 65-74, or 75-84, 85-99) using the STRATA statement [1-3]. In the multivariable model, the following variables were adjusted for: age (continuous variable within each age stratum), sex, income status (quartile: 1st [low income], 2nd, 3rd, and 4th), smoking status (current smoker, former smoker, never smoker, or missing information), alcohol use frequency (days/week; <1, 1-2, 3-4, 5-7, or missing information), physical activity (moderate activity for  $\geq 30$  minutes per week; none, once,  $\geq 2$  times), SBP (continuous variable), fasting glucose (continuous variable), BMI (<18.5, 18.5-24.9, 25-29.9, or  $\geq 30$  kg/m<sup>2</sup>), log transformation of triglyceride levels (continuous variable), and HDL-C levels (<40, 40-59, or  $\geq 60$  mg/dL). Based on qualitative observations of the curvilinear association, the intervals of 44 mg/dL (roughly 1.5 mmol/L) with the lowest risk (the lowest unweighted geometric mean of HRs in 3 consecutive LDL-C categories in the 11-group analysis) were identified as the optimal range. An analysis excluding the first 3 years of follow-up was performed. In the Cox model for CVD mortality, the cause-specific hazard method was used to handle competing risks; individuals who experienced other causes of death or reached the end of the follow-up were treated

as censored. Schoenfeld residuals were used to test the proportional hazard assumption. Subgroup analyses by age and sex, as well as various categorical, spline, and linear analyses, served as sensitivity analyses. Cochran's Q statistic was calculated as the interaction test to examine the difference in the effect size of each 1-mmol/L increment of LDL-C between age and sex groups. All p-values were 2-sided. All analyses used SAS version 9.4 (SAS Institute Inc., Cary, NC, USA).

## Reference

1. Yi SW, Ohrr H, Shin SA, Yi JJ. Sex-age-specific association of body mass index with all-cause mortality among 12.8 million Korean adults: a prospective cohort study. *Int J Epidemiol*. 2015;44(5):1696-1705.
2. Yi SW, Yi JJ, Ohrr H. Total cholesterol and all-cause mortality by sex and age: a prospective cohort study among 12.8 million adults. *Sci Rep*. 2019;9(1):1596.
3. Yi SW, Park SJ, Yi JJ, Ohrr H, Kim H. High-density lipoprotein cholesterol and all-cause mortality by sex and age: a prospective cohort study among 15.8 million adults. *Int J Epidemiol*. 2020.

- The National Health Insurance Service (NHIS) provides mandatory health insurance for 97% of the Korean population and nationwide biennial health screening.
- Clinical chemistry and anthropometric and blood pressure measurement were performed, and Information on smoking status, alcohol use, physical activity, and history of various diseases was collected via a questionnaire, during each biennial health screenings.
- The health examinations and data collection followed a standard protocol documented by the Ministry of Health and Welfare.

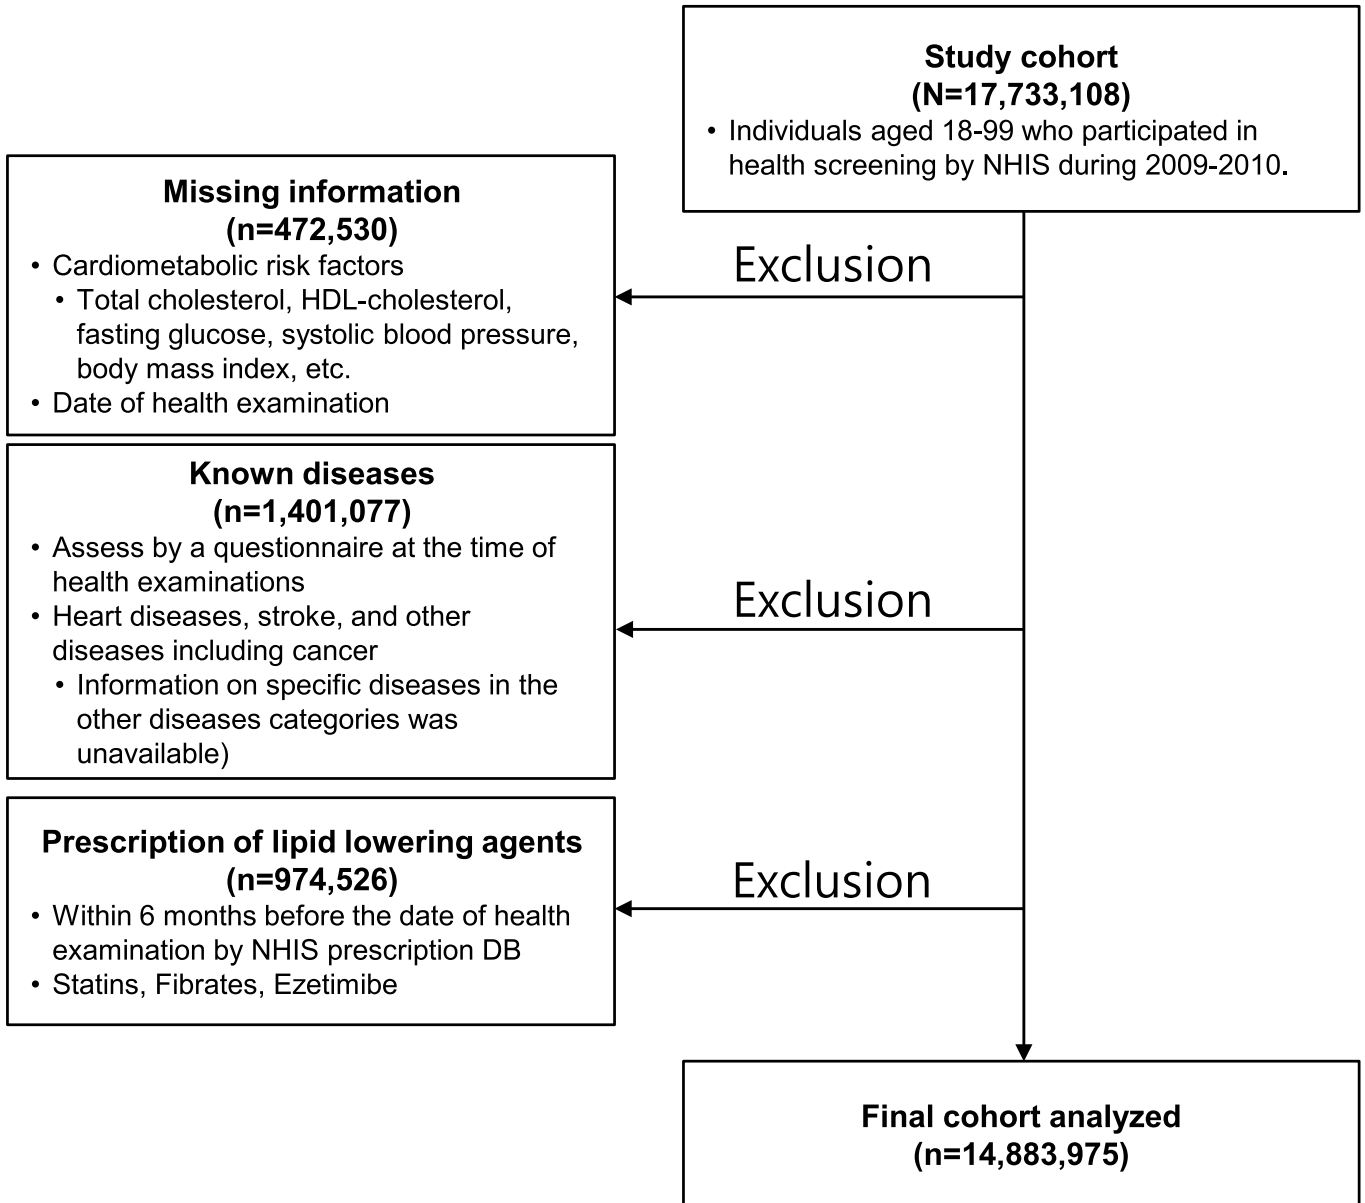

Figure S1. Study flow chart

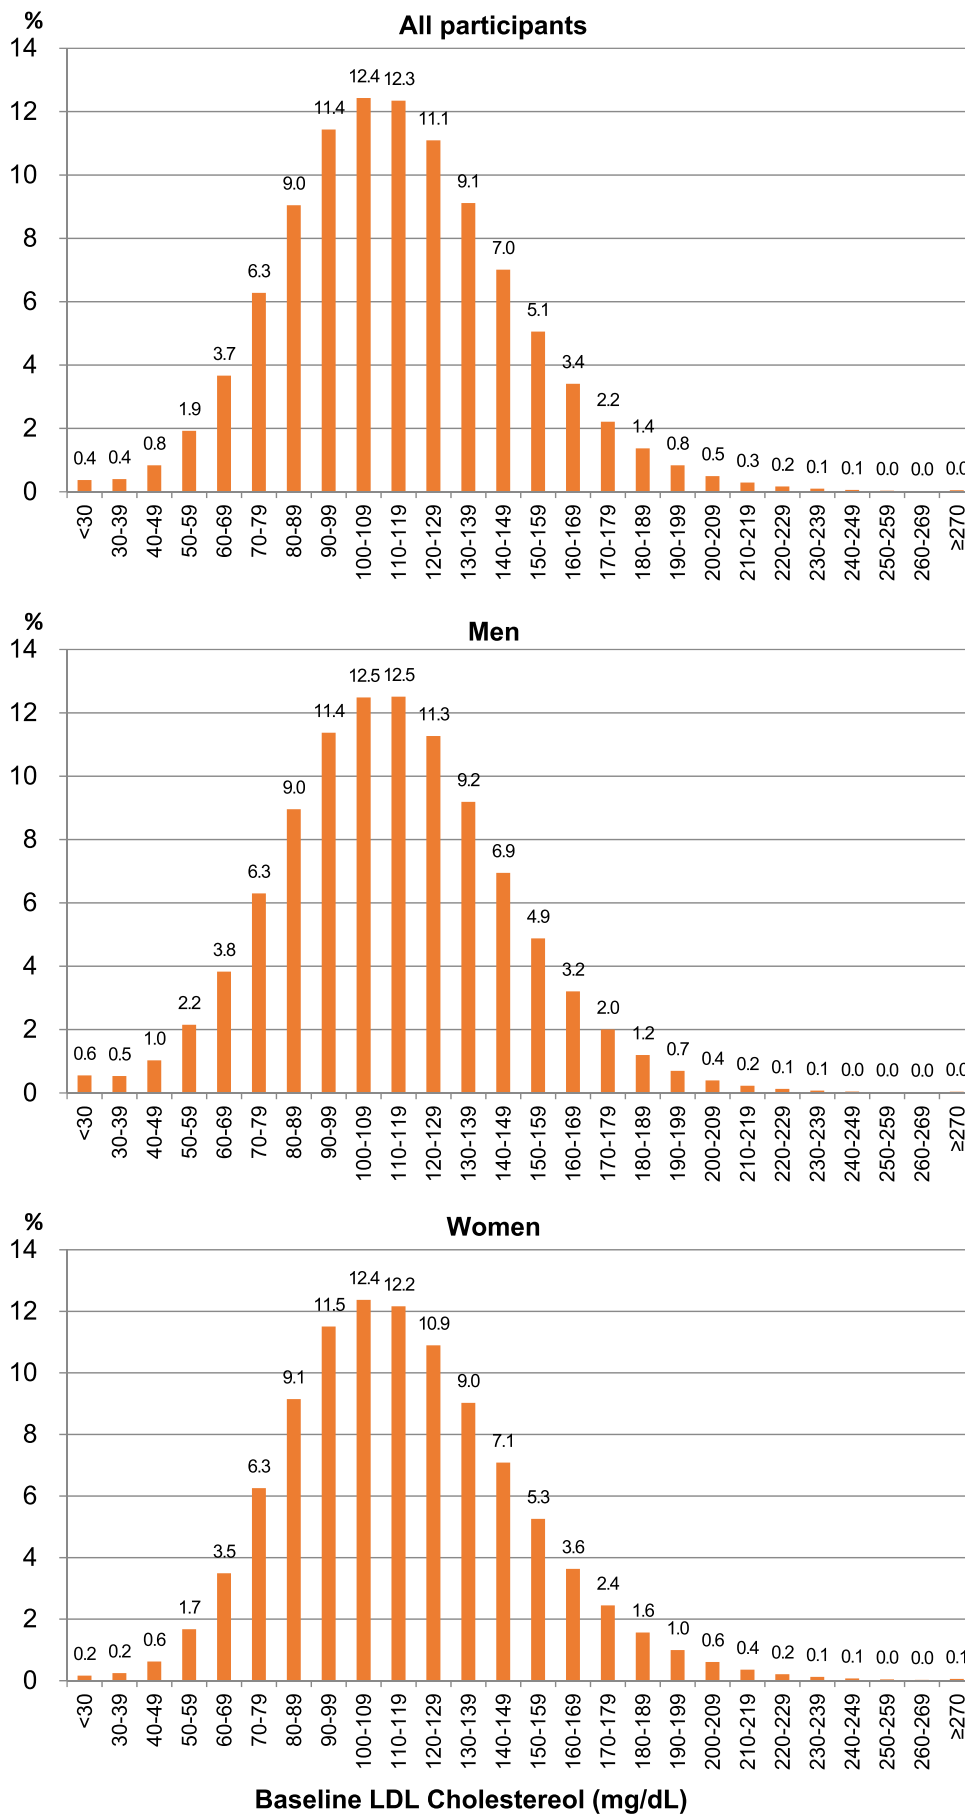

**Figure S2. Distribution of low density lipoprotein-cholesterol (LDL-C) concentration.**  
 To convert cholesterol from mg/dL to mmol/L, multiply by 0.02586

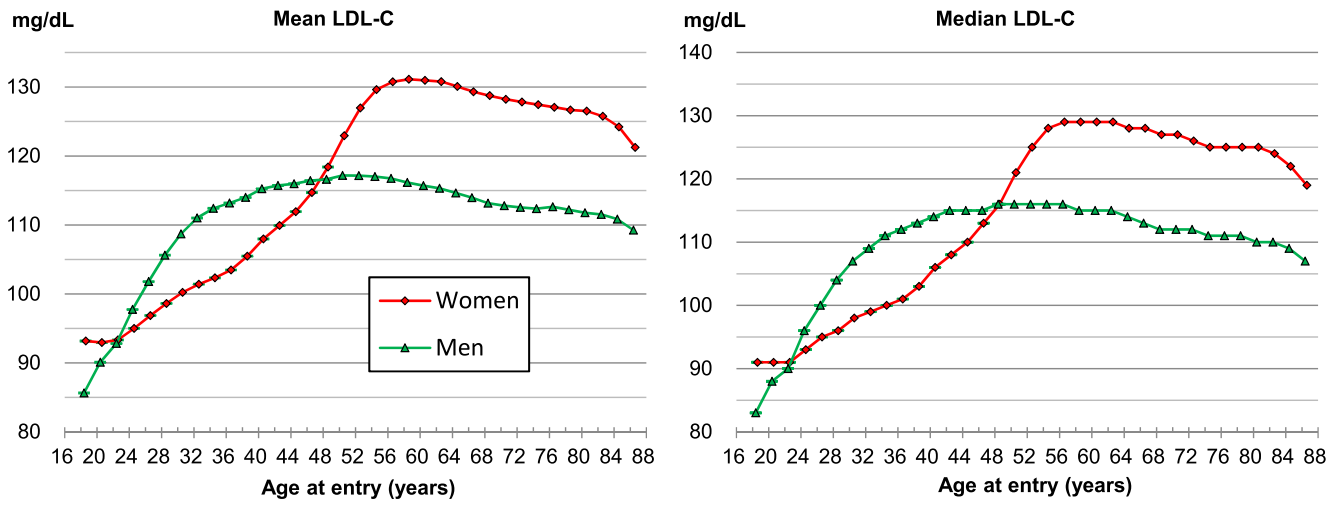

**Figure S3. Mean and median concentrations of low-density lipoprotein cholesterol (LDL-C).**  
 To convert LDL-C from mg/dL to mmol/L, multiply by 0.02586.

### All participants

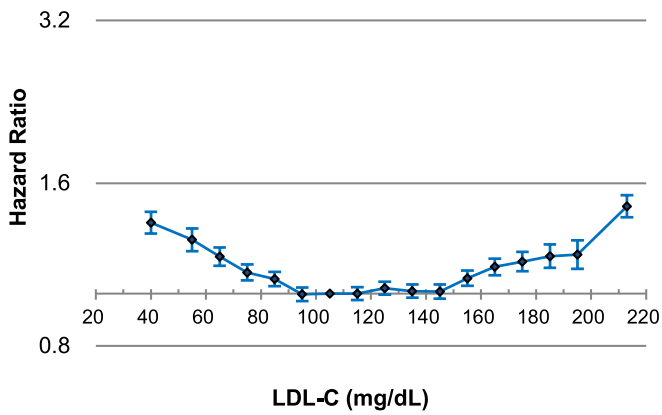

### Sex-specific analysis

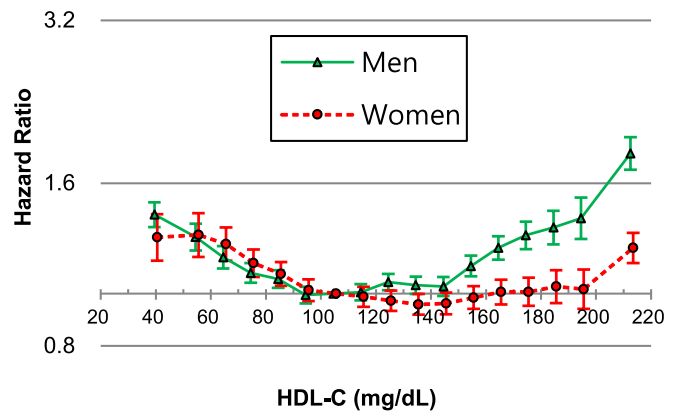

**Figure S4. HRs\* across 17 categories of LDL-C for CVD mortality.**

LDL-C categories (mg/dL: <50, 50-59 to 190-199 by 10,  $\geq 200$ , 100-109 as reference). The midpoint was used as a representative value of each LDL-C category, except both ends (40 and 213) for which the median was used. \*Hazard ratios and 95% confidence intervals were calculated using Cox proportional hazard models with adjustment for sex (for all participants only), age at baseline, smoking status, alcohol consumption frequency, physical activity, household income, systolic blood pressure, fasting glucose, body mass index, triglyceride and high-density lipoprotein cholesterol. CVD cardiovascular disease; LDL-C, low density lipoprotein cholesterol. To convert LDL-C from mg/dL to mmol/L, multiply by 0.02586.



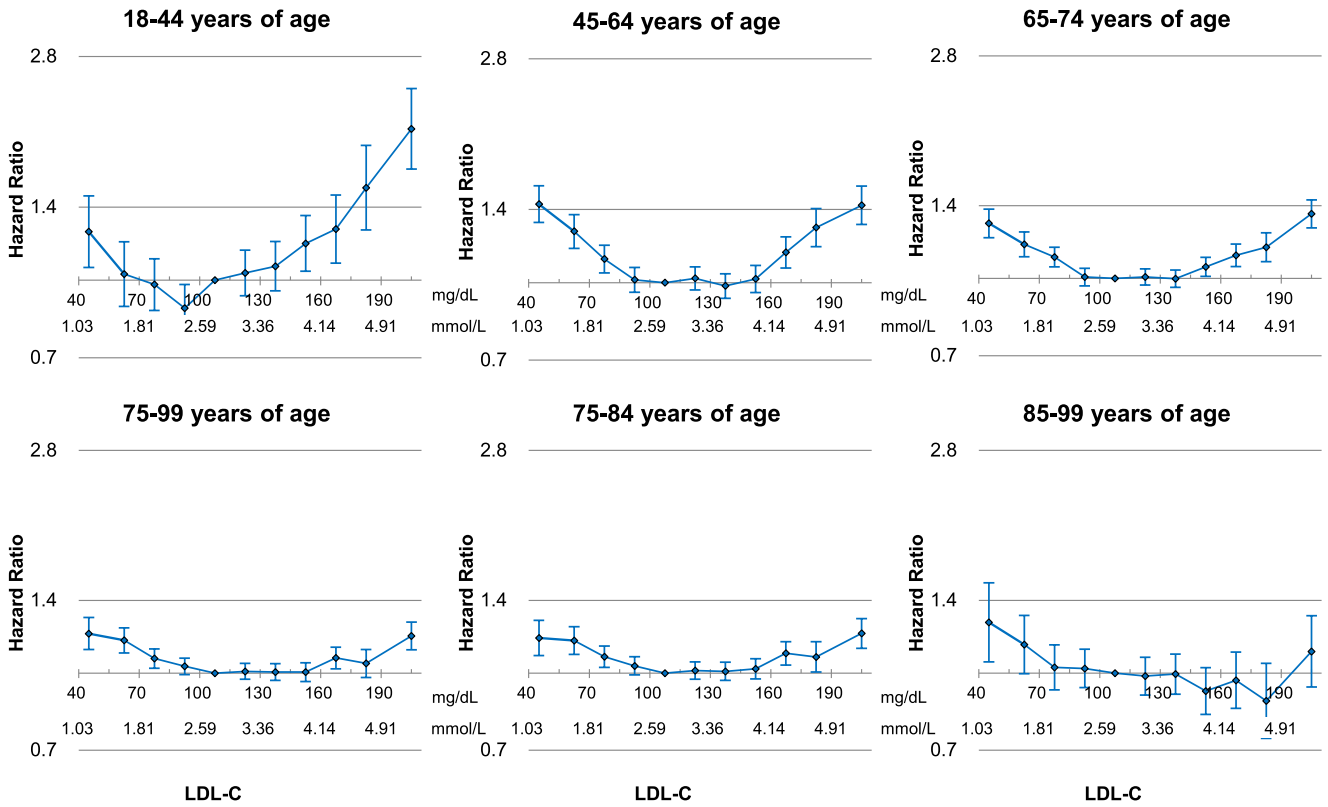

**Figure S5. HRs\* across 11 categories of LDL-C for CVD mortality according to age.**

LDL-C categories (mg/dL: <55, 55-69 to 175-189 by 15,  $\geq 190$ , 100-114 as reference). The midpoint was used as a representative value of each LDL-C category, except both ends (45 and 205) for which the median was used.

\*Hazard ratios and 95% confidence intervals were calculated using the same method as in Figure S4. CVD cardiovascular disease; LDL-C, low density lipoprotein cholesterol. To convert LDL-C from mg/dL to mmol/L, multiply by 0.02586.

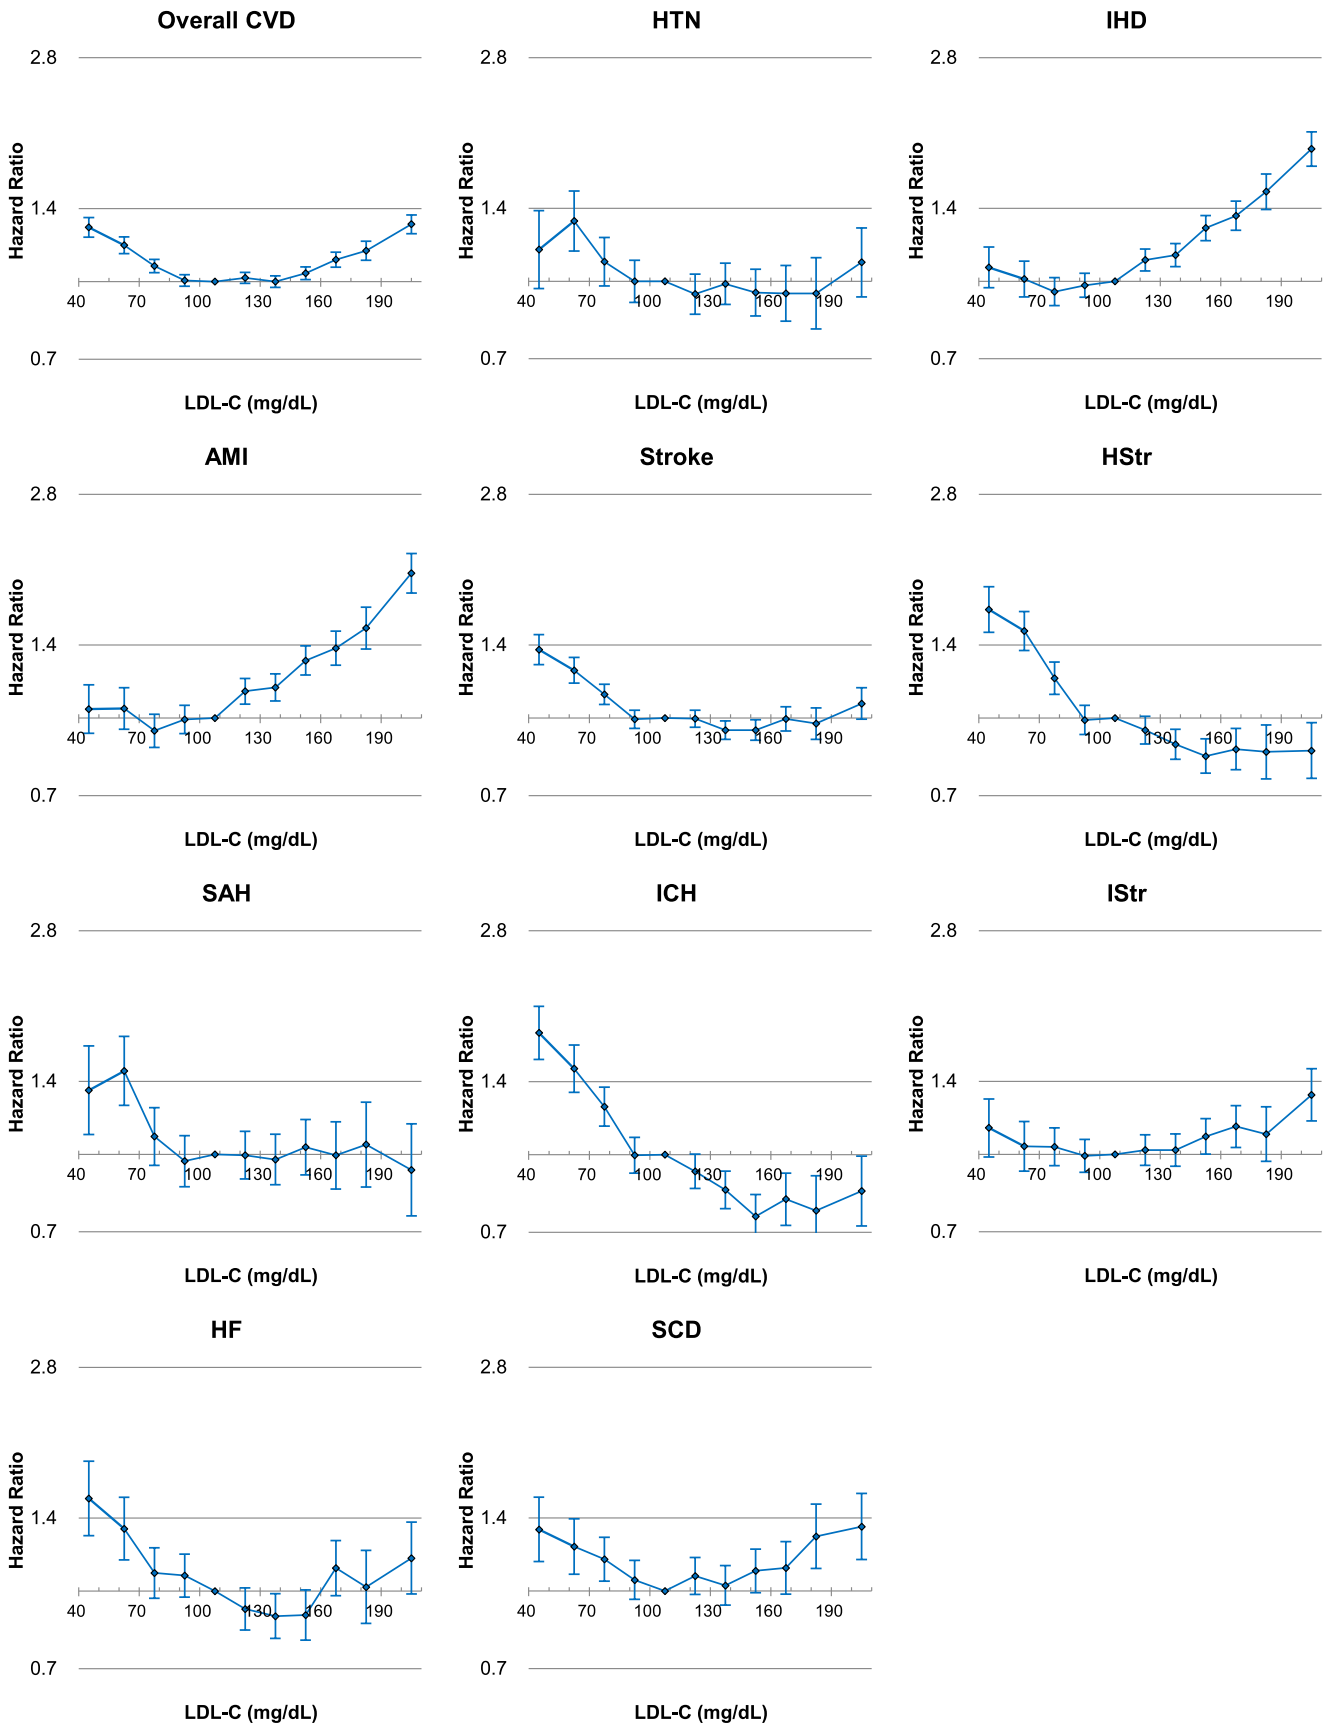

**Figure S6. HRs\* for mortality from CVD and its subtypes after exclusion of first 3 years of deaths.**

LDL-C categories (mg/dL: <55, 55-69 to 175-189 by 15,  $\geq 190$ , 100-114 as reference). The midpoint was used as a representative value of each LDL-C category, except both ends (45 and 205) for which the median was used. \*Hazard ratios (HRs) and 95% confidence intervals were calculated using the same method as in Figure S4. AMI, acute myocardial infarction; CVD cardiovascular disease; HF, heart failure; HStr, hemorrhagic stroke; HTN, hypertensive disease; ICH, intracerebral hemorrhage; IHD, ischemic heart disease; IStr, ischemic stroke; LDL-C, low density lipoprotein cholesterol; SAH, subarachnoid hemorrhage; SCD, sudden cardiac death. To convert LDL-C from mg/dL to mmol/L, multiply by 0.02586.

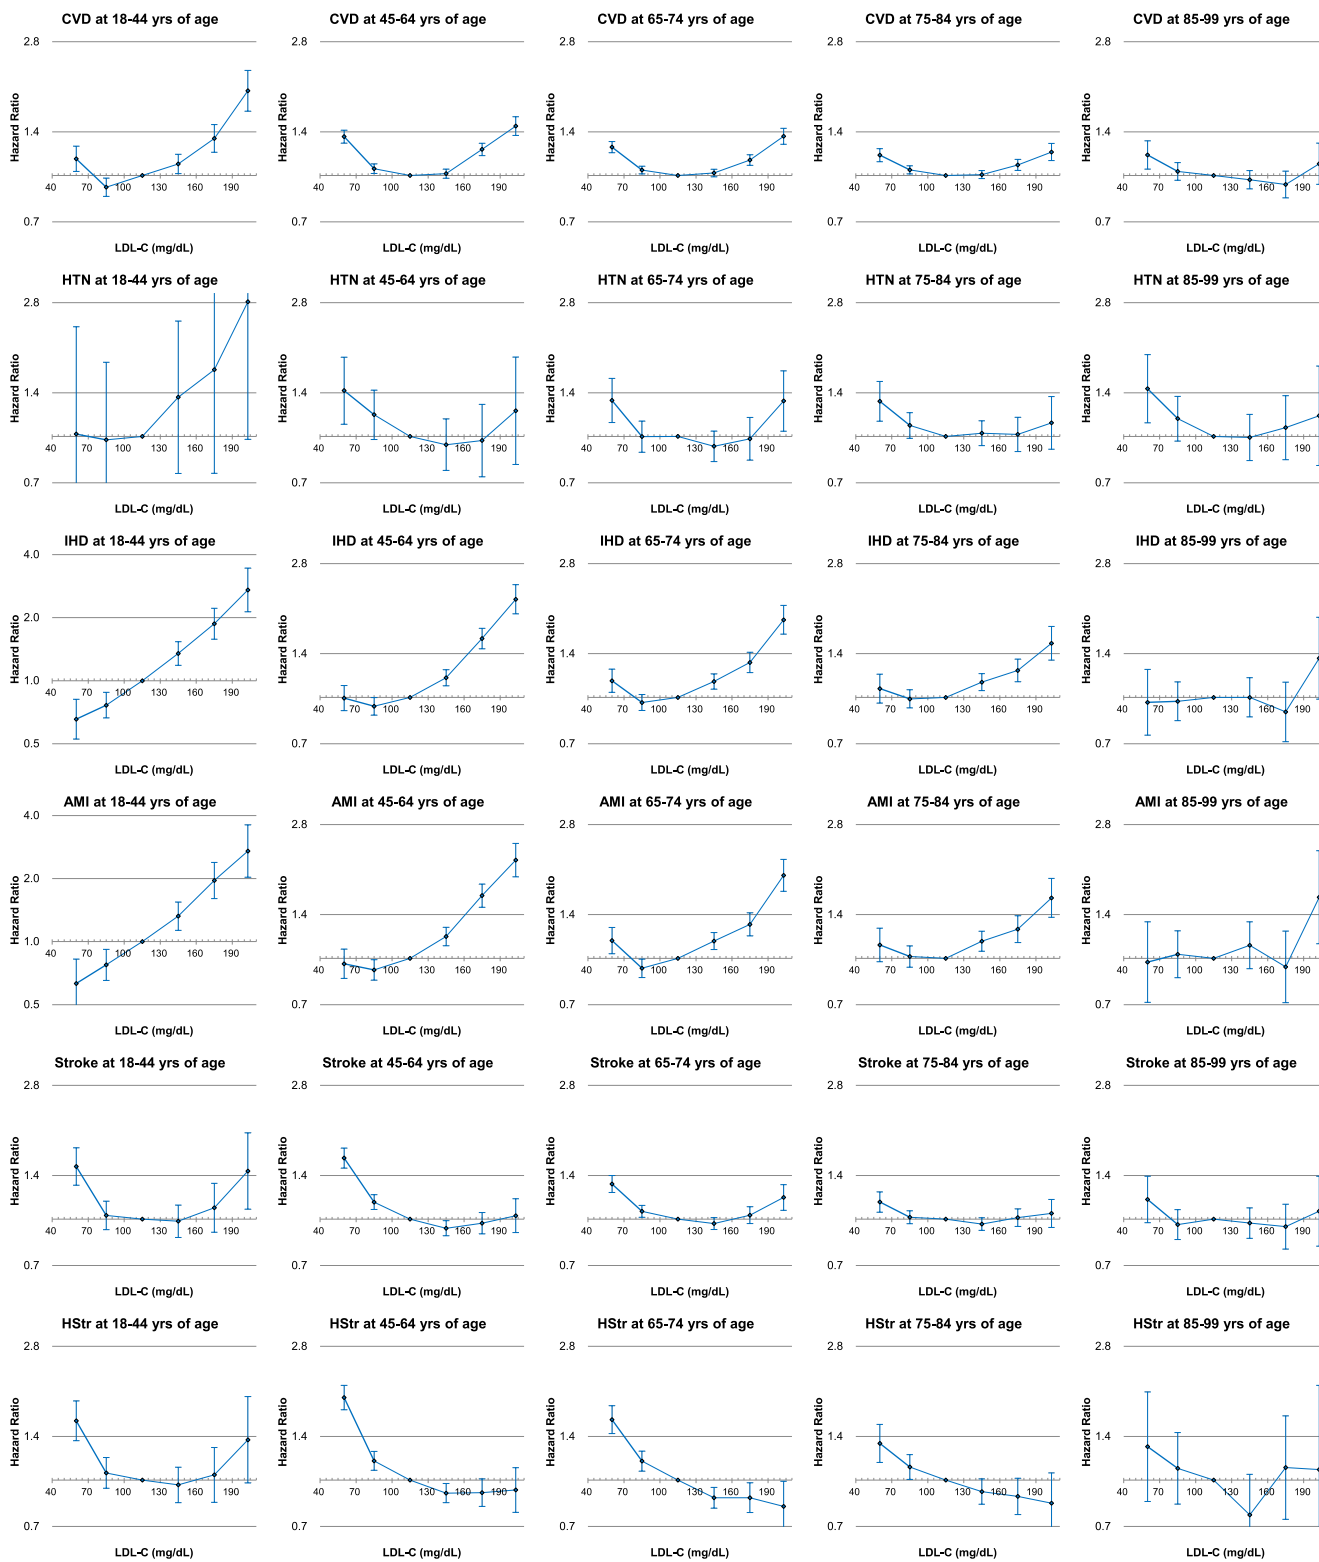

**Figure S7. HRs\* for mortality from CVD and its subtypes according to age**

LDL-C categories (mg/dL: <70, 70-99, 100-129 [reference], 130-159, 160-189,  $\geq 190$ ). The midpoint was used as a representative value of each LDL-C category, except both ends (45 and 205) for which the median was used.

\*Hazard ratios and 95% confidence intervals were calculated using the same method as in Figure S4. Same abbreviation was used as in Figure S6. To convert LDL-C from mg/dL to mmol/L, multiply by 0.02586.

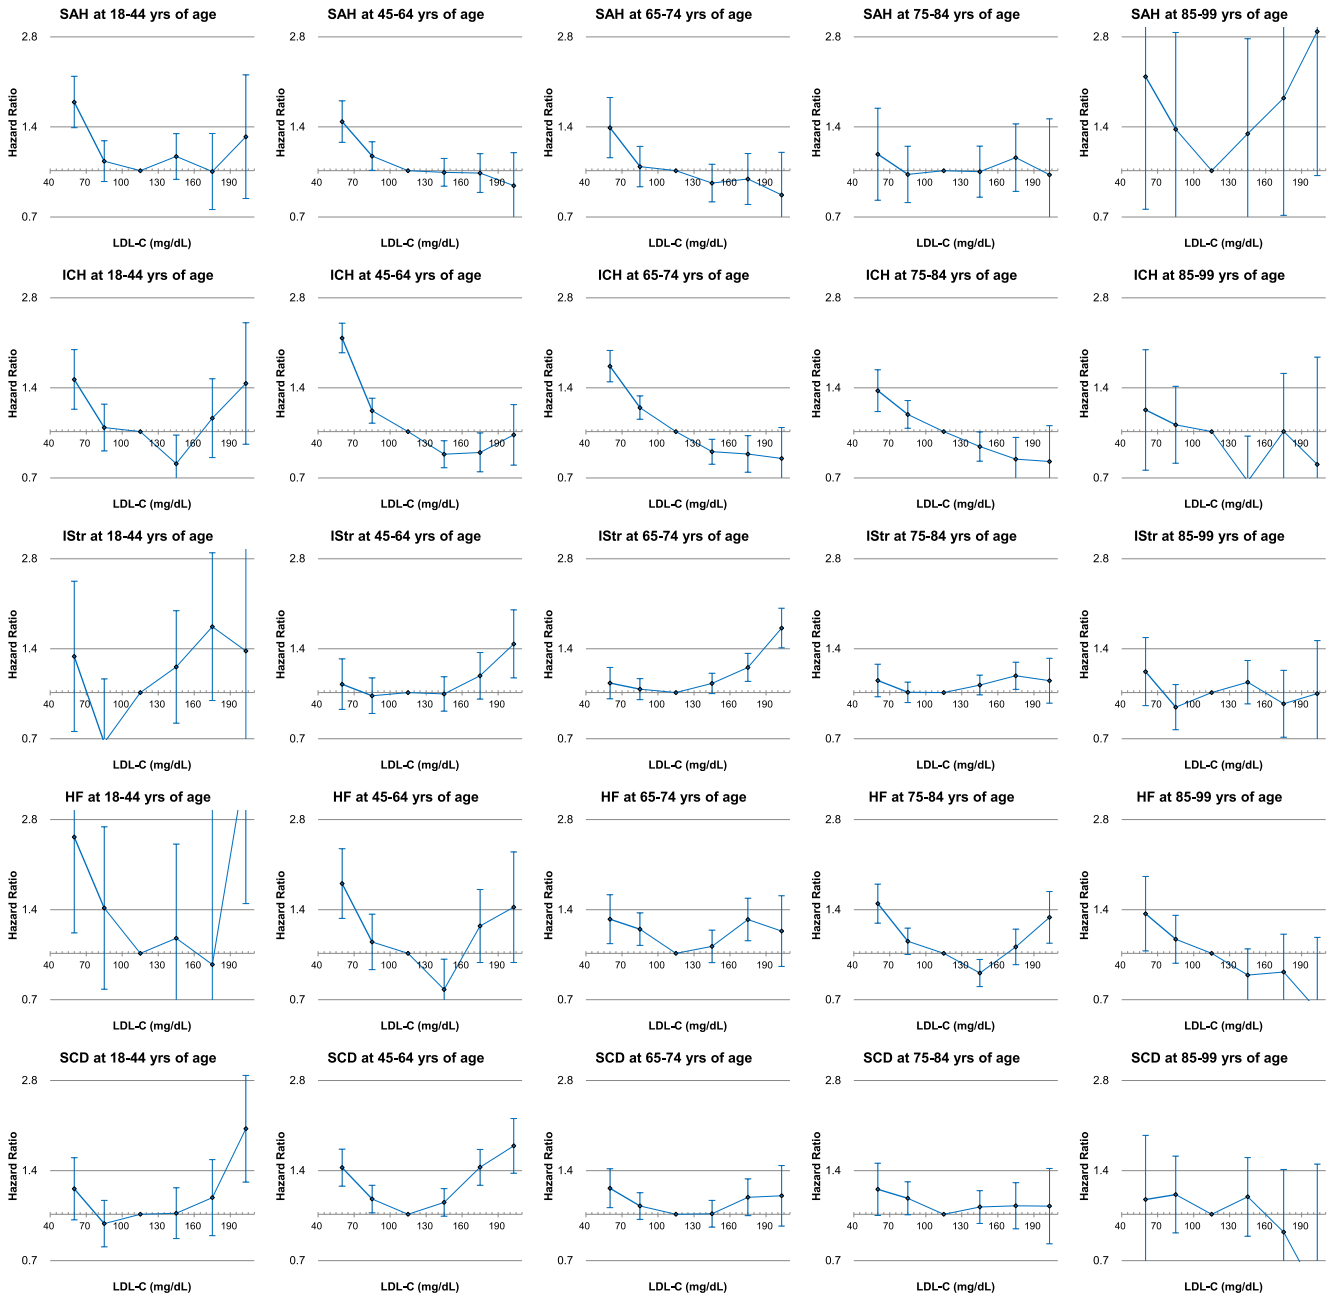

Figure S7. Continued.

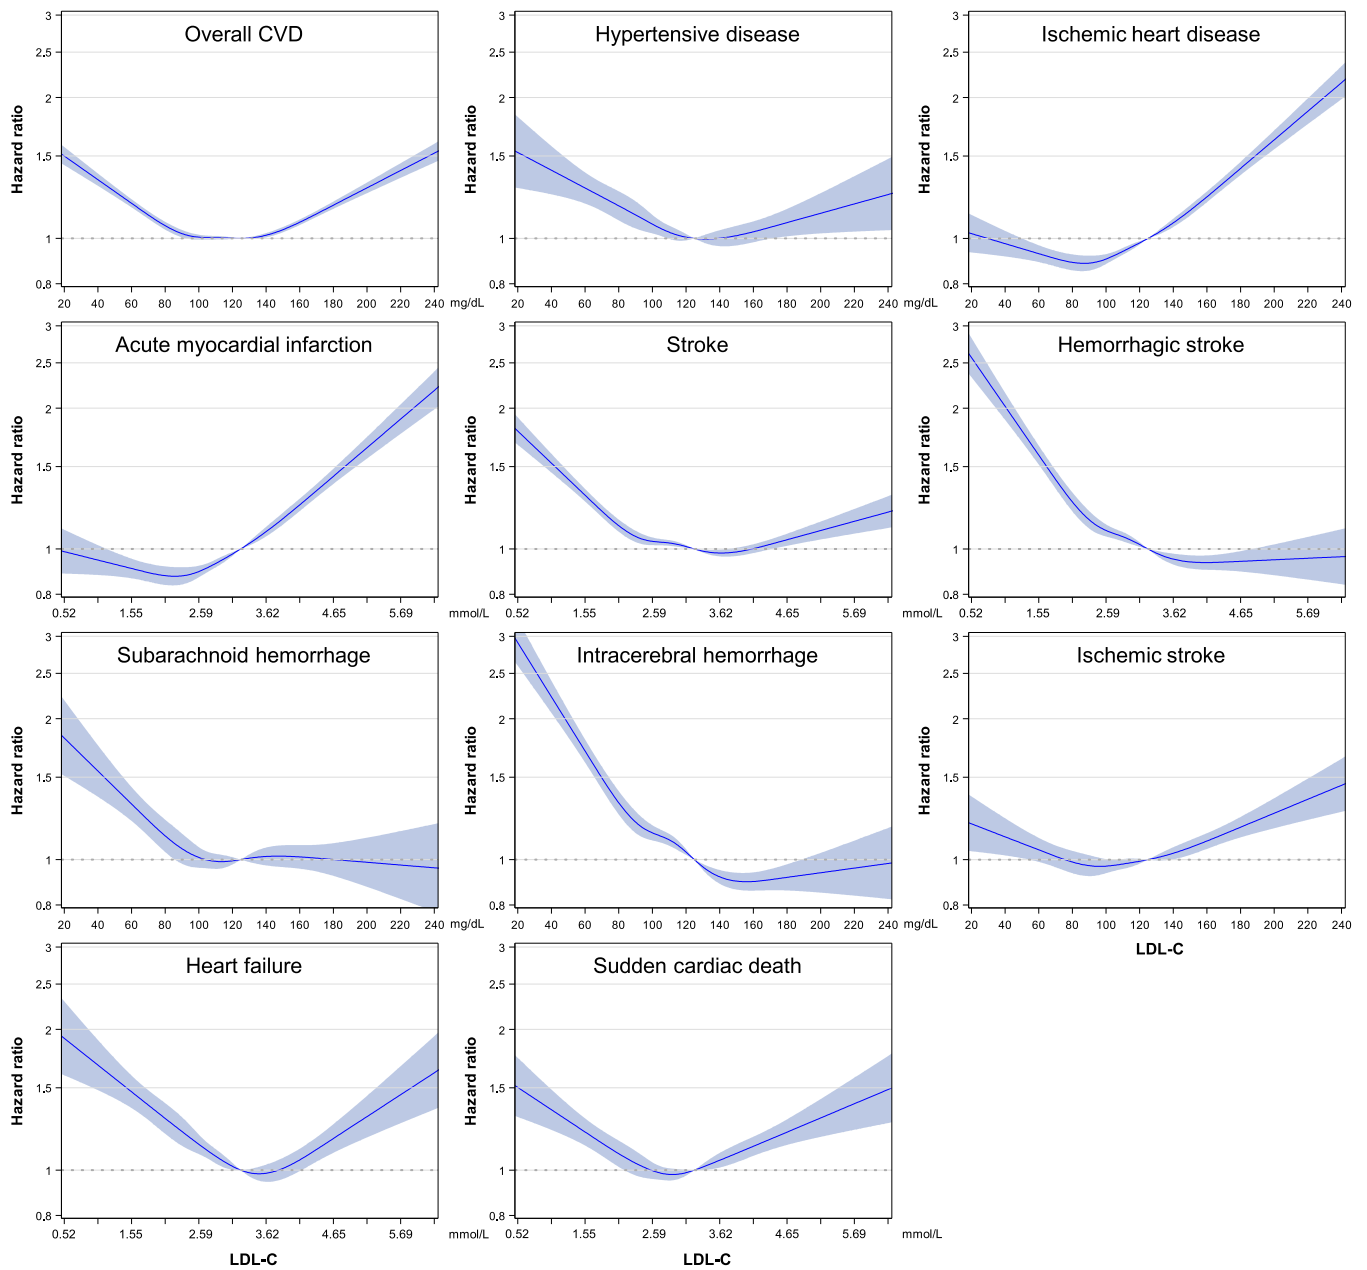

**Figure S8. HRs\* for mortality from cardiovascular disease (CVD) and its subtypes using spline analysis.** Restricted cubic splines of low-density lipoprotein cholesterol (LDL-C) with 5 knots (5th, 27.5th, 50th, 72.5th, and 95th percentile) and 125 mg/dL as a reference were used. \*Hazard ratios and 95% CIs were calculated using Cox proportional hazards models after adjustment for the same variables as in Figure S4. To convert cholesterol from mg/dL to mmol/L, multiply by 0.02586.

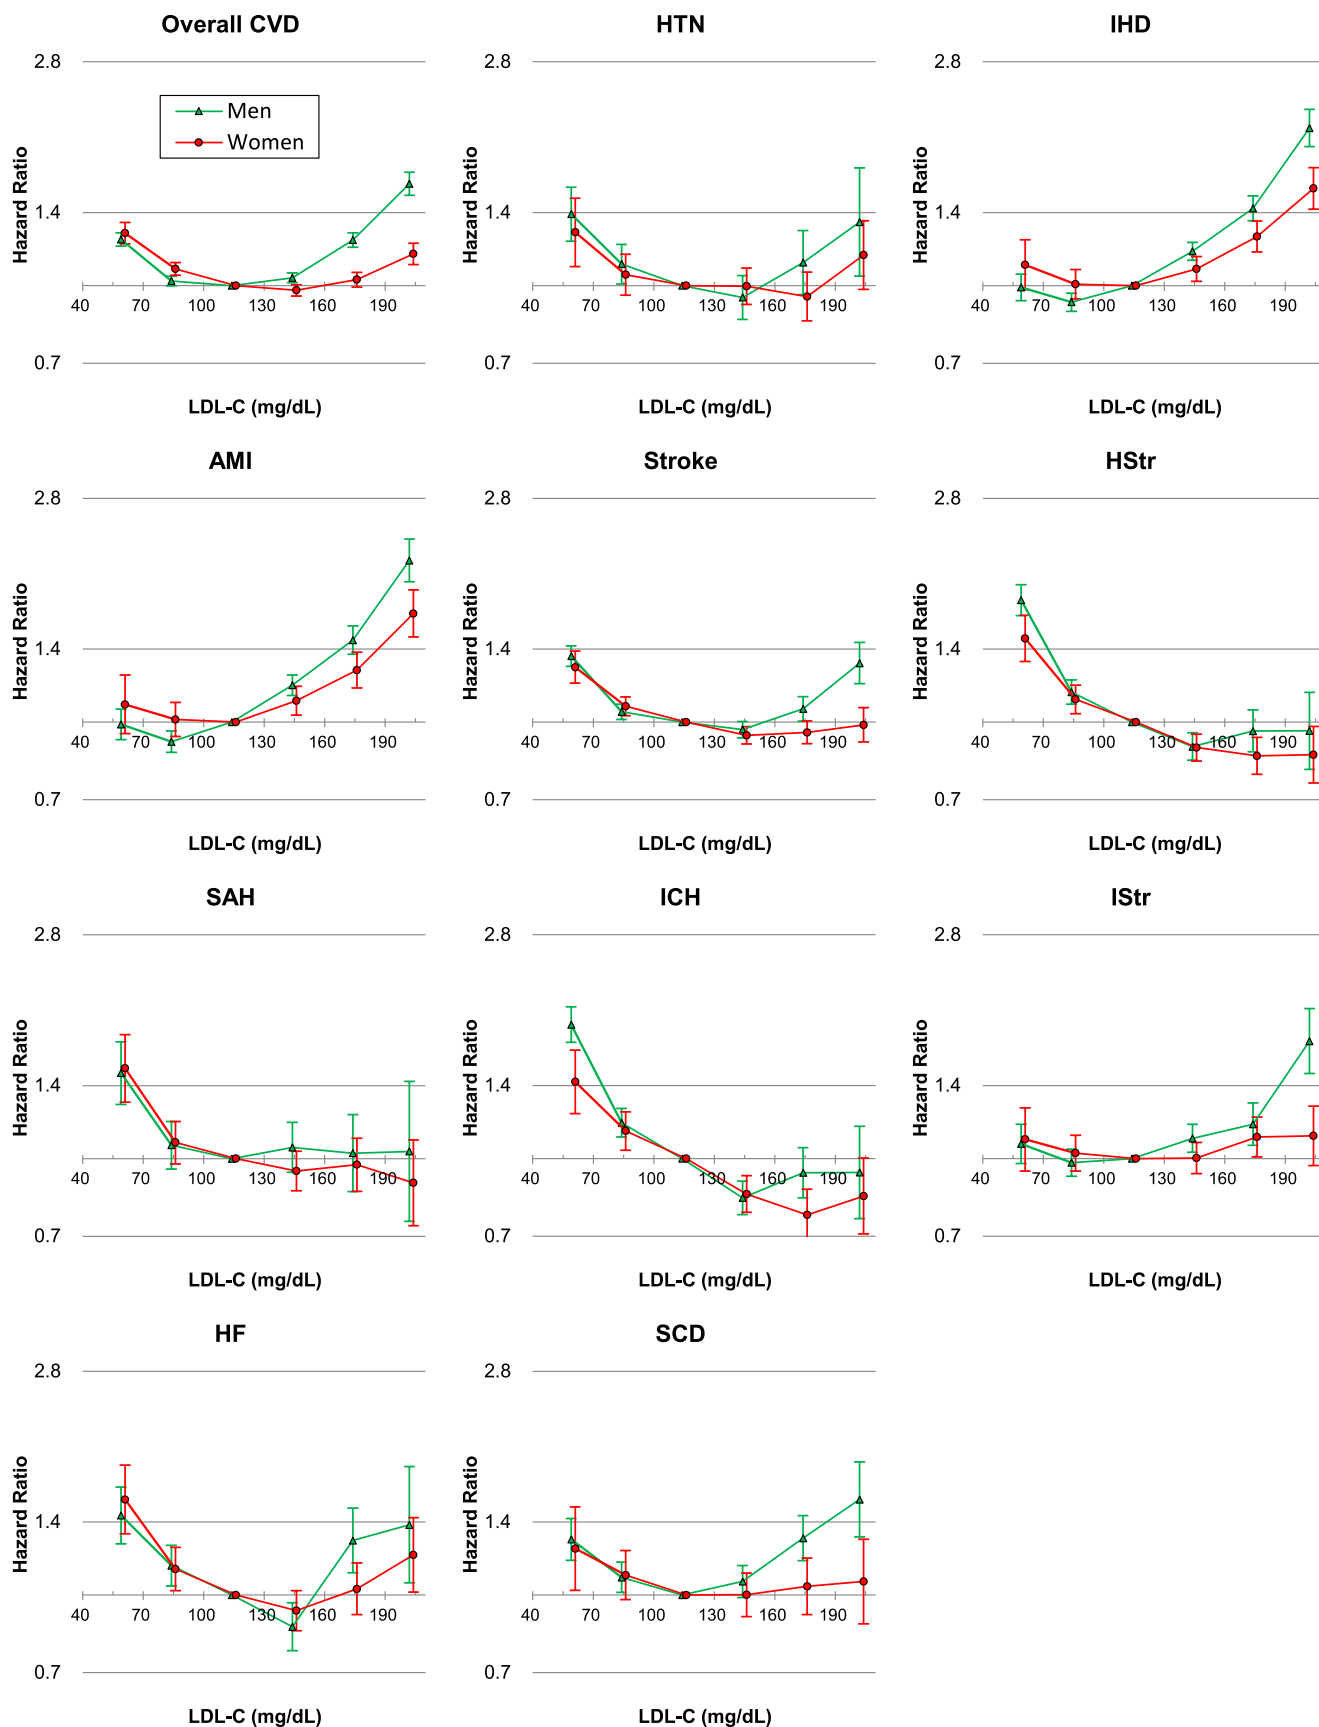

**Figure S9. HRs\* across 6 categories of LDL-C for mortality from CVD and its subtypes according to sex.** LDL-C categories (mg/dL: <70, 70-99, 100-129 [reference], 130-159, 160-189,  $\geq 190$ ). The midpoint was used as a representative value of each LDL-C category, except both ends (45 and 205) for which the median was used. \*Hazard ratios and 95% confidence intervals were calculated using the same method as in Figure S4. Same abbreviation was used as in Figure S6. To convert LDL-C from mg/dL to mmol/L, multiply by 0.02586.

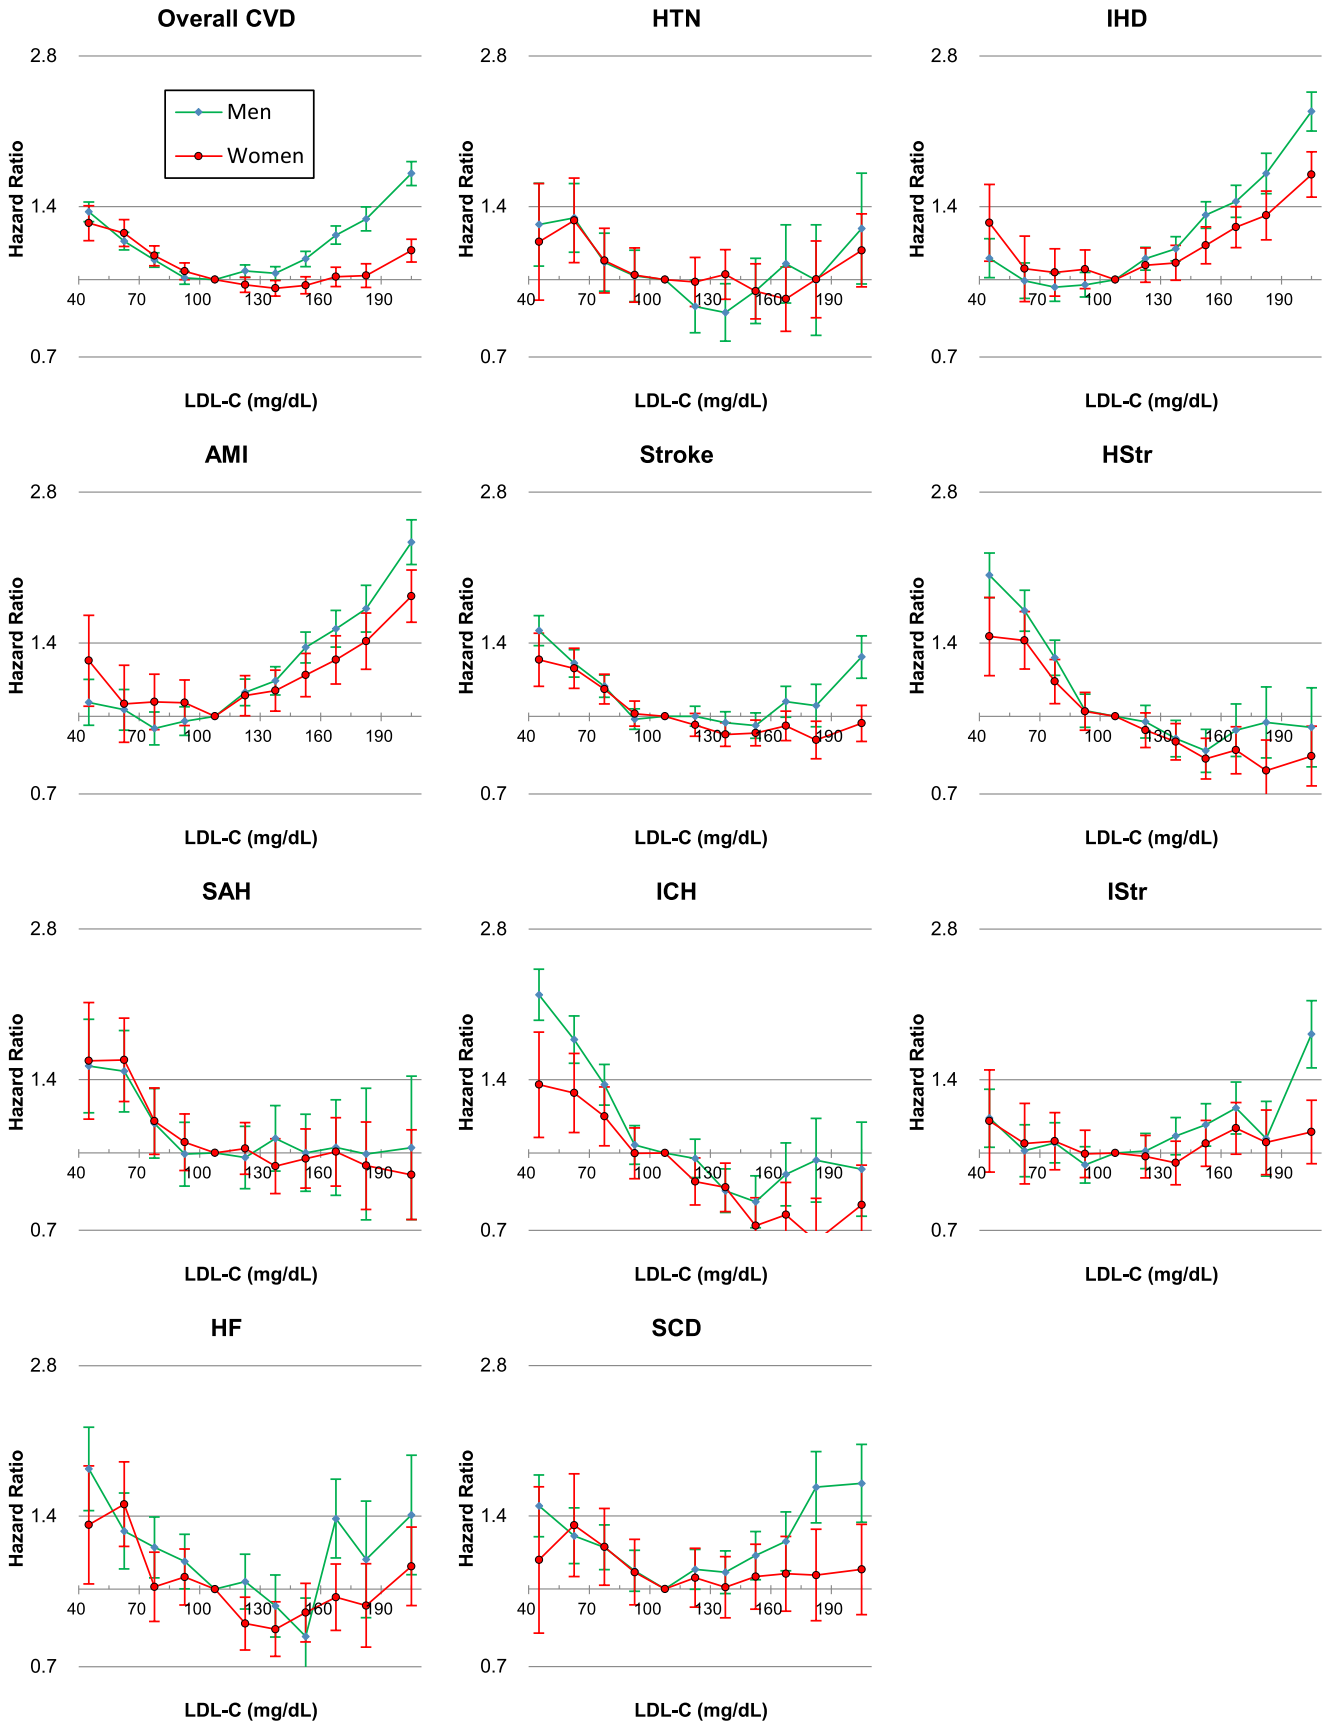

**Figure S10. HRs\* across 11 categories of LDL-C for mortality from CVD and its subtypes according to sex.** LDL-C categories (mg/dL: <55, 55-69 to 175-189 by 15, ≥190, 100-114 as reference). The midpoint was used as a representative value of each LDL-C category, except both ends (45 and 205) for which the median was used. \*Hazard ratios and 95% confidence intervals were calculated using the same method as in Figure S4. Same abbreviation was used as in Figure S6. To convert LDL-C from mg/dL to mmol/L, multiply by 0.02586.

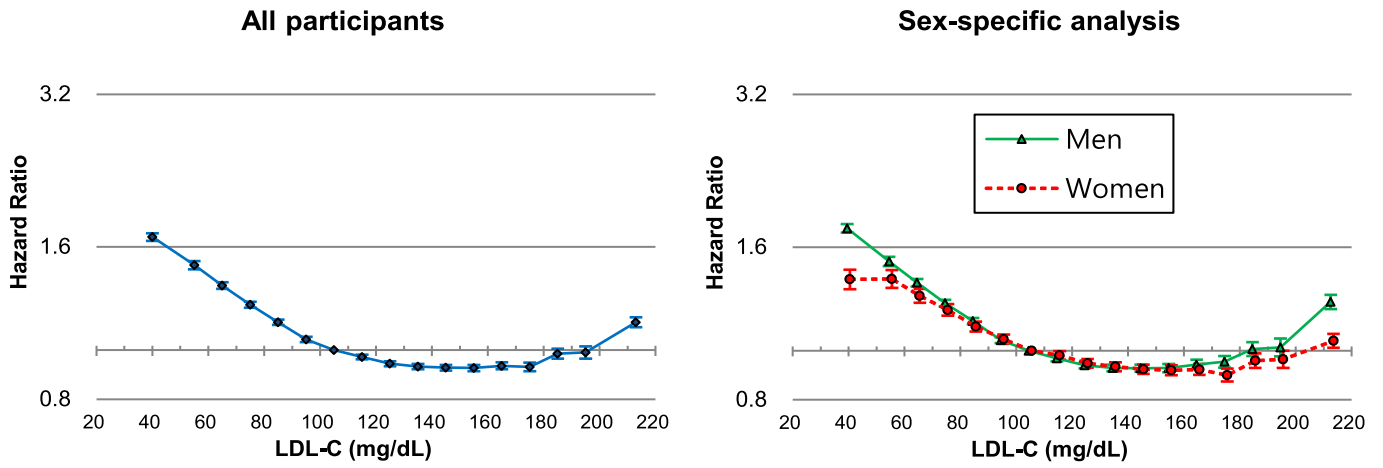

**Figure S11. HRs\* across 17 categories of LDL-C for all-cause mortality (no. of death=536,975).** LDL-C categories (mg/dL: <50, 50-59 to 190-199 by 10,  $\geq 200$ , 100-109 as reference). The midpoint was used as a representative value of each LDL-C category, except both ends (40 and 213) for which the median was used. \*Hazard ratios and 95% confidence intervals were calculated using Cox proportional hazard models with adjustment for sex (for all participants only), age at baseline, smoking status, alcohol consumption frequency, physical activity, household income, systolic blood pressure, fasting glucose, body mass index, triglyceride and high-density lipoprotein cholesterol. LDL-C, low density lipoprotein cholesterol. To convert LDL-C from mg/dL to mmol/L, multiply by 0.02586.



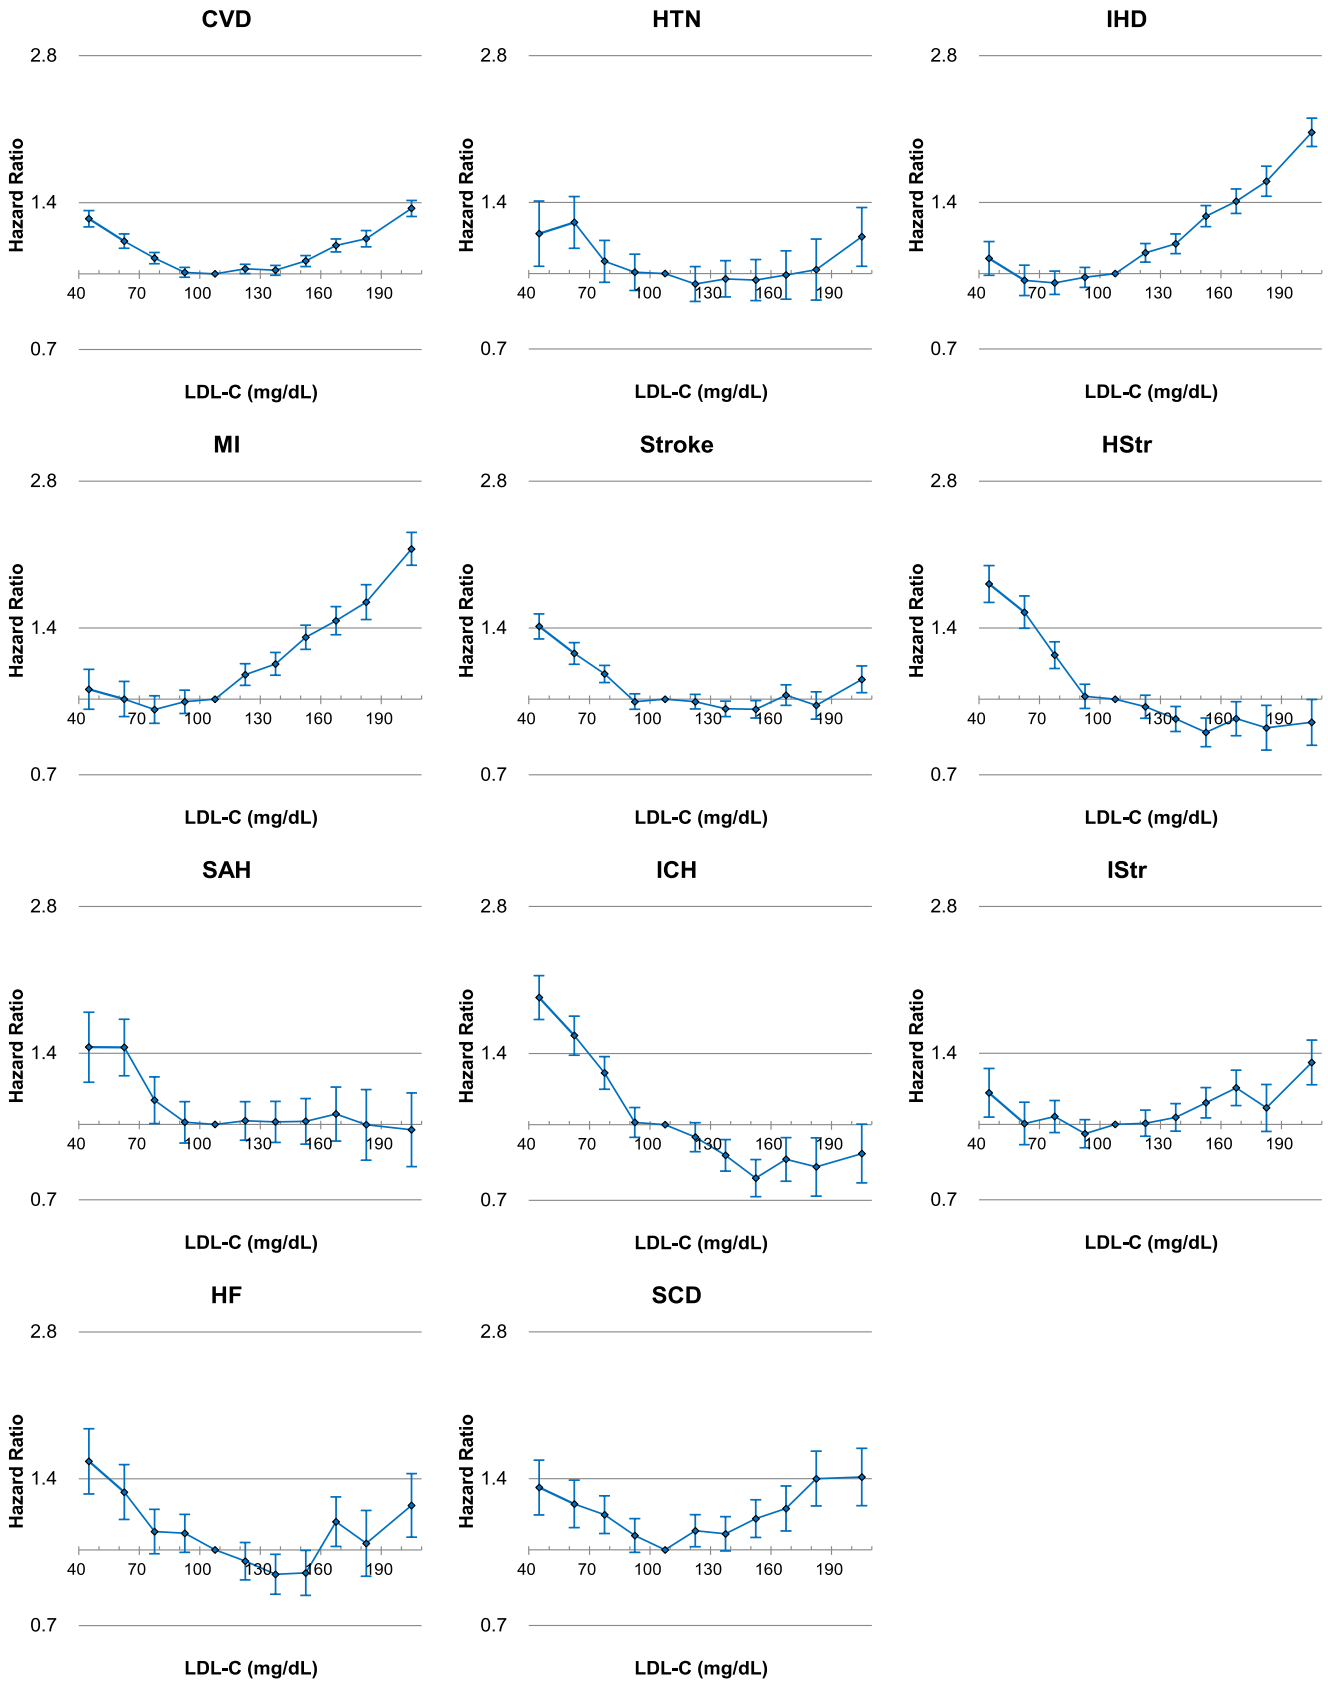

**Figure S12. HRs\* for mortality from CVD and its subtypes after further adjustment for anemia (sensitivity analysis)**

LDL-C categories (mg/dL: <55, 55-69 to 175-189 by 15, ≥190, 100-114 as reference). The midpoint was used as a representative value of each LDL-C category, except both ends (45 and 205) for which the median was used.

\*Hazard ratios and 95% confidence intervals were calculated using the same method as in Figure S4 after further adjustment for anemia (defined by baseline hemoglobin <12 [women], <13 g/L [men]). Same abbreviation was used as in Figure S6. To convert LDL-C from mg/dL to mmol/L, multiply by 0.02586.

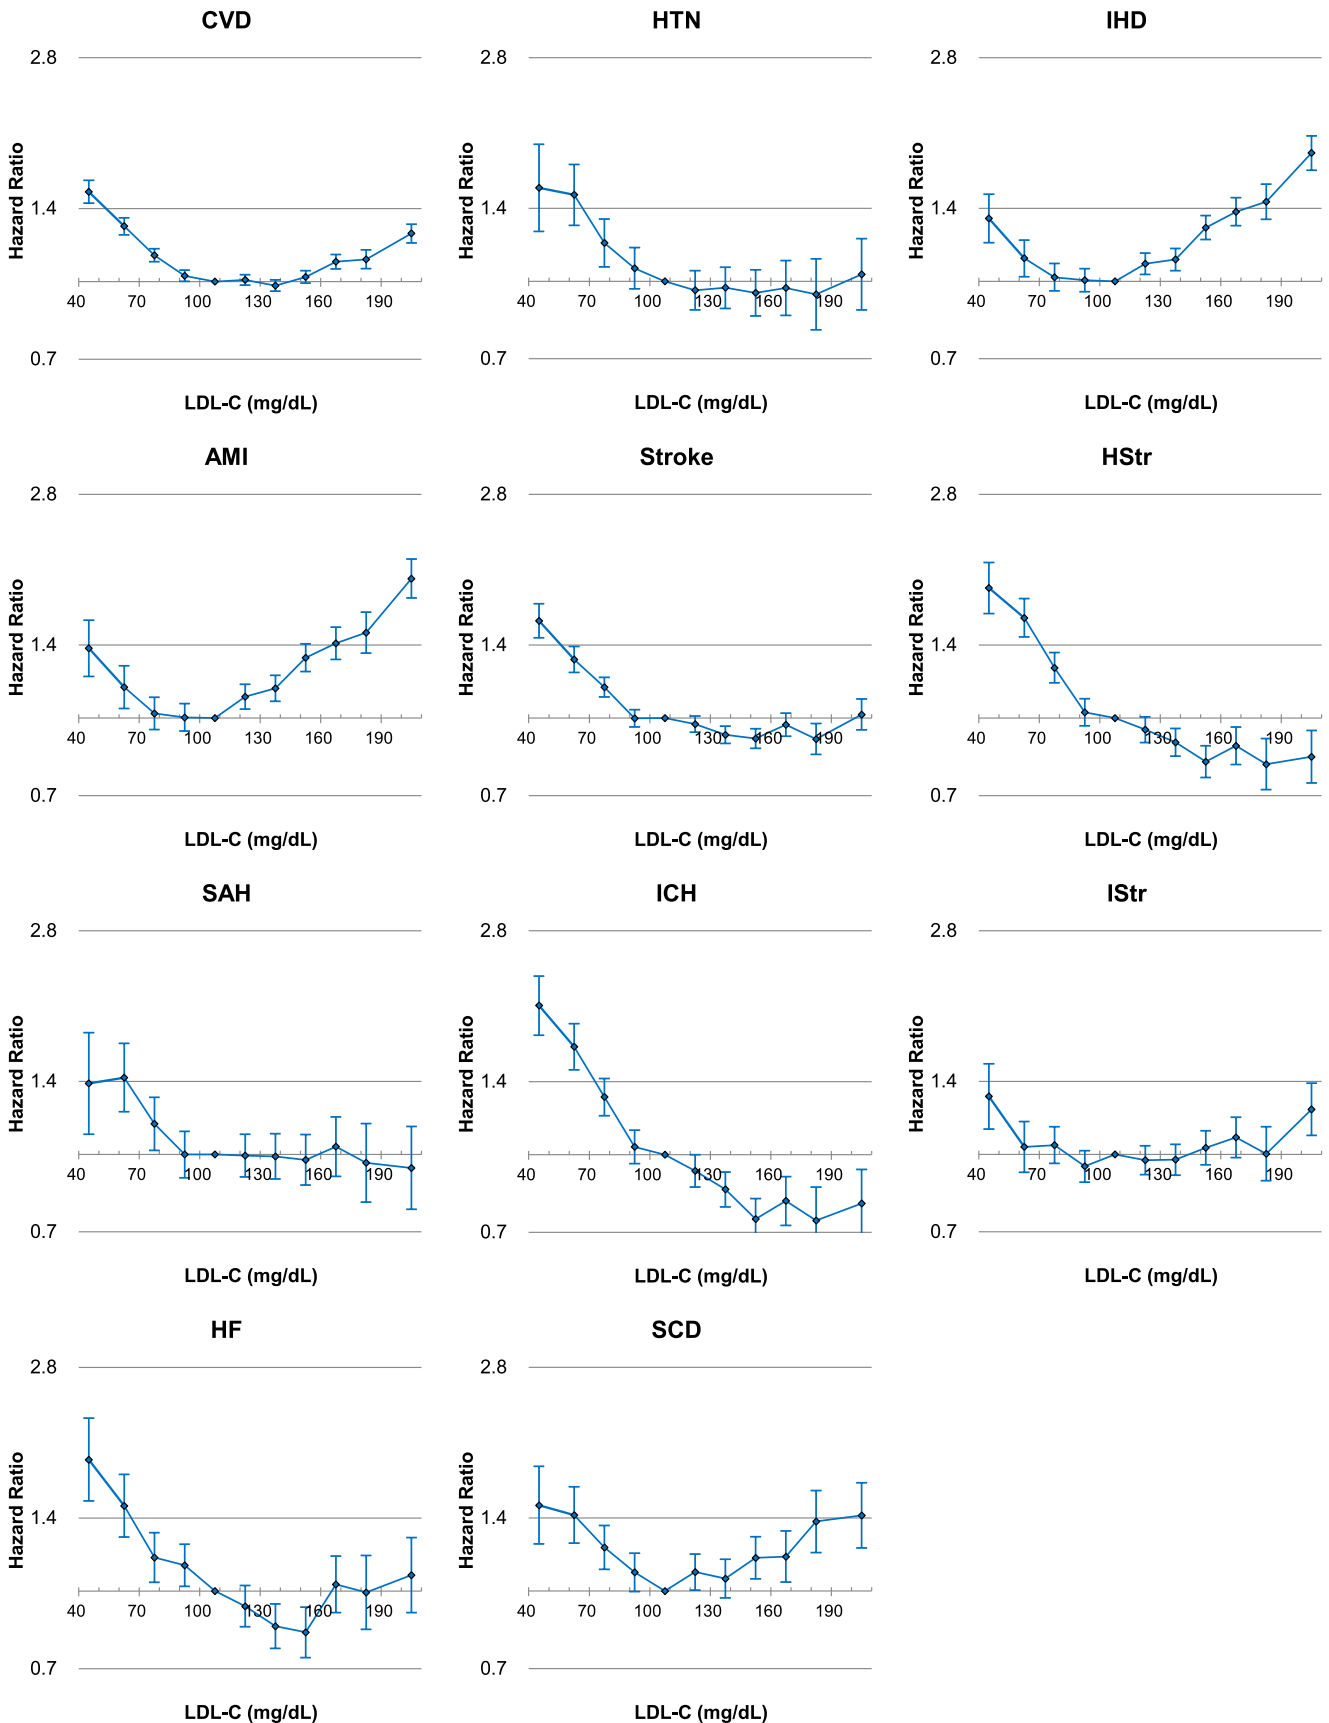

**Figure S13. HRs\* for mortality from CVD and its subtypes in individuals with triglyceride <200 mg/dL in which Friedewald measurements have a higher validity (sensitivity analysis)**

LDL-C categories (mg/dL: <55, 55-69 to 175-189 by 15, ≥190, 100-114 as reference). The midpoint was used as a representative value of each LDL-C category, except both ends (45 and 205) for which the median was used.

\*Hazard ratios and 95% confidence intervals were calculated using the same method as in Figure S4. Same abbreviation was used as in Figure S6. To convert LDL-C from mg/dL to mmol/L, multiply by 0.02586.

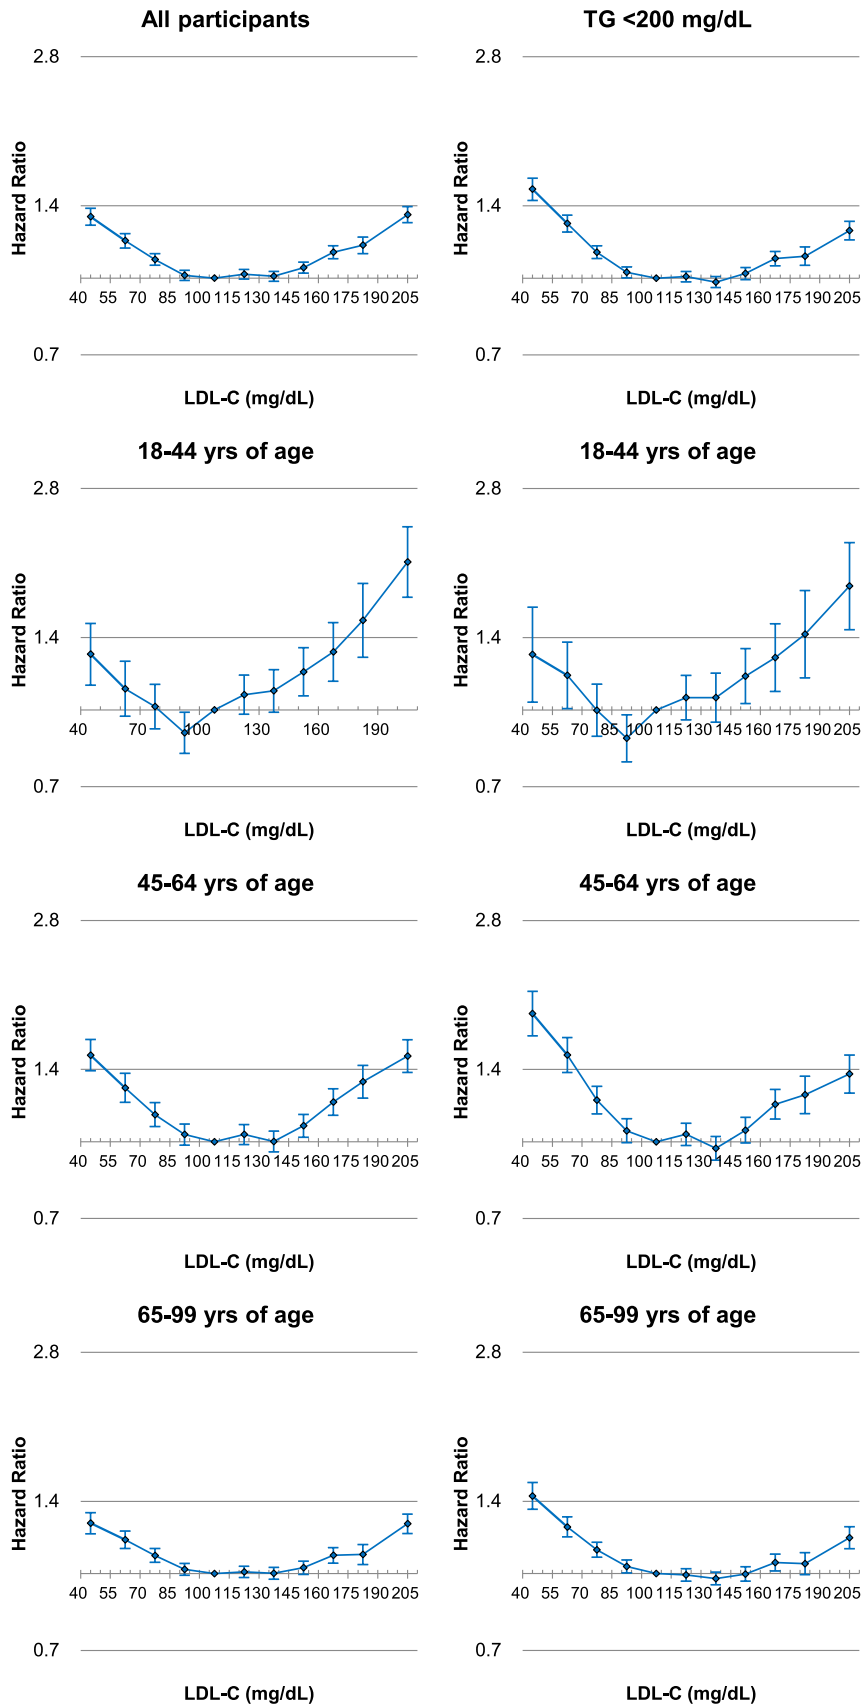

**Figure S14. HRs\* for CVD mortality by age in all participants and individuals with triglyceride <200 mg/dL in which Friedewald measurements have a higher validity (sensitivity analysis)**

\*Hazard ratios and 95% confidence intervals were calculated using the same method as in Figure S4. CVD cardiovascular disease; LDL-C, low density lipoprotein cholesterol. To convert LDL-C from mg/dL to mmol/L, multiply by 0.02586.

**Table S1. Number of deaths from cardiovascular causes by sex**

| Cardiovascular causes of death | ICD-10  | Total  |         | Men    |         | Women  |         |
|--------------------------------|---------|--------|---------|--------|---------|--------|---------|
|                                |         | n      | (%)     | n      | (%)     | n      | (%)     |
| Cardiovascular diseases        | I00-I99 | 94,344 | (100.0) | 56,057 | (100.0) | 38,287 | (100.0) |
| Rheumatic heart diseases       | I00-I09 | 174    | (0.2)   | 80     | (0.1)   | 94     | (0.2)   |
| Hypertensive diseases          | I10-I15 | 6,792  | (7.2)   | 3,141  | (5.6)   | 3,651  | (9.5)   |
| Ischemic heart diseases        | I20-I25 | 24,496 | (26.0)  | 16,530 | (29.5)  | 7,966  | (20.8)  |
| AMI                            | I21     | 18,307 | (19.4)  | 12,371 | (22.1)  | 5,936  | (15.5)  |
| Pulmonary heart diseases       | I26-I28 | 932    | (1.0)   | 404    | (0.7)   | 528    | (1.4)   |
| Other heart diseases           | I30-I52 | 20,917 | (22.2)  | 12,542 | (22.4)  | 8,375  | (21.9)  |
| Heart failure                  | I50     | 5,978  | (6.3)   | 2,820  | (5.0)   | 3,158  | (8.2)   |
| Sudden cardiac death           | I46     | 8,177  | (8.7)   | 5,610  | (10.0)  | 2,567  | (6.7)   |
| Stroke                         | I60-I69 | 38,085 | (40.4)  | 21,505 | (38.4)  | 16,580 | (43.3)  |
| Hemorrhagic stroke             | I60-I62 | 15,178 | (16.1)  | 8,234  | (14.7)  | 6,944  | (18.1)  |
| Subarachnoid hemorrhage        | I60     | 5,461  | (5.8)   | 2,266  | (4.0)   | 3,195  | (8.3)   |
| Intracerebral hemorrhage       | I61-I62 | 9,717  | (10.3)  | 5,968  | (10.6)  | 3,749  | (9.8)   |
| Ischemic stroke                | I63     | 11,845 | (12.6)  | 6,901  | (12.3)  | 4,944  | (12.9)  |
| Diseases of arteries           | I70-I79 | 2,669  | (2.8)   | 1,704  | (3.0)   | 965    | (2.5)   |
| Other diseases                 | I80-I99 | 279    | (0.3)   | 151    | (0.3)   | 128    | (0.3)   |

**Table S2. Mean and median of LDL-C (mg/dL) (Including numerical version of Figure 1).**

| Age, years | Men and women |        |       |        | Men       |        |       |        | Women     |        |       |        | Sex difference <sup>a</sup> |       |
|------------|---------------|--------|-------|--------|-----------|--------|-------|--------|-----------|--------|-------|--------|-----------------------------|-------|
|            | n             | Median | Mean  | (SD)   | n         | Median | Mean  | (SD)   | n         | Median | Mean  | (SD)   | Median                      | Mean  |
| 18-99      | 14,884,975    | 112    | 114.5 | (33.4) | 7,839,191 | 112    | 113.1 | (14.2) | 7,045,784 | 113    | 116.1 | (33.6) | -1                          | -3.0  |
| 18-19      | 28,495        | 88     | 90.3  | (24.4) | 10,885    | 83     | 85.6  | (24.0) | 17,610    | 91     | 93.2  | (24.3) | -8                          | -7.5  |
| 20-21      | 78,304        | 90     | 92.0  | (25.2) | 26,458    | 88     | 90.1  | (25.2) | 51,846    | 91     | 93.0  | (25.2) | -3                          | -2.9  |
| 22-23      | 193,128       | 91     | 93.1  | (25.7) | 71,525    | 90     | 92.8  | (26.1) | 121,603   | 91     | 93.3  | (25.4) | -1                          | -0.5  |
| 24-25      | 348,494       | 94     | 96.1  | (26.5) | 144,828   | 96     | 97.7  | (27.6) | 203,666   | 93     | 95.0  | (25.5) | 3                           | 2.7   |
| 26-27      | 546,642       | 97     | 99.4  | (27.7) | 281,707   | 100    | 101.8 | (29.0) | 264,935   | 95     | 96.9  | (26.1) | 5                           | 4.9   |
| 28-29      | 650,862       | 100    | 102.8 | (29.0) | 389,735   | 104    | 105.6 | (29.9) | 261,127   | 96     | 98.6  | (26.9) | 8                           | 7.0   |
| 30-31      | 599,261       | 103    | 105.7 | (30.0) | 384,486   | 107    | 108.7 | (30.8) | 214,775   | 98     | 100.2 | (27.5) | 9                           | 8.5   |
| 32-33      | 548,637       | 106    | 107.9 | (30.8) | 370,791   | 109    | 111.0 | (31.7) | 177,846   | 99     | 101.4 | (27.8) | 10                          | 9.6   |
| 34-35      | 544,394       | 107    | 109.3 | (31.2) | 376,774   | 111    | 112.4 | (32.2) | 167,620   | 100    | 102.3 | (27.7) | 11                          | 10.1  |
| 36-37      | 570,437       | 108    | 110.2 | (31.6) | 394,670   | 112    | 113.2 | (32.7) | 175,767   | 101    | 103.5 | (27.8) | 11                          | 9.7   |
| 38-39      | 581,369       | 109    | 111.3 | (31.7) | 397,242   | 113    | 114.0 | (32.9) | 184,127   | 103    | 105.5 | (28.1) | 10                          | 8.5   |
| 40-41      | 937,267       | 109    | 111.5 | (31.4) | 450,709   | 114    | 115.2 | (33.4) | 486,558   | 106    | 108.0 | (28.9) | 8                           | 7.3   |
| 42-43      | 851,086       | 111    | 112.9 | (31.7) | 433,357   | 115    | 115.7 | (33.5) | 417,729   | 108    | 109.9 | (29.3) | 7                           | 5.8   |
| 44-45      | 757,921       | 112    | 114.0 | (32.0) | 385,578   | 115    | 116.0 | (33.7) | 372,343   | 110    | 111.9 | (30.0) | 5                           | 4.0   |
| 46-47      | 746,117       | 114    | 115.6 | (32.3) | 373,973   | 115    | 116.4 | (33.8) | 372,144   | 113    | 114.7 | (30.7) | 2                           | 1.7   |
| 48-49      | 829,996       | 116    | 117.5 | (32.9) | 406,439   | 116    | 116.6 | (33.9) | 423,557   | 116    | 118.4 | (31.9) | 0                           | -1.8  |
| 50-51      | 811,891       | 119    | 120.2 | (33.5) | 388,572   | 116    | 117.2 | (33.9) | 423,319   | 121    | 123.0 | (33.0) | -5                          | -5.8  |
| 52-53      | 724,917       | 121    | 122.2 | (34.2) | 352,502   | 116    | 117.1 | (34.0) | 372,415   | 125    | 127.0 | (33.7) | -9                          | -9.8  |
| 54-55      | 678,462       | 122    | 123.6 | (34.7) | 325,196   | 116    | 117.0 | (34.0) | 353,266   | 128    | 129.6 | (34.2) | -12                         | -12.6 |
| 56-57      | 548,884       | 123    | 123.9 | (34.8) | 268,104   | 116    | 116.7 | (33.9) | 280,780   | 129    | 130.8 | (34.2) | -13                         | -14.0 |
| 58-59      | 469,870       | 122    | 123.9 | (34.8) | 227,833   | 115    | 116.1 | (33.8) | 242,037   | 129    | 131.1 | (34.2) | -14                         | -15.0 |
| 60-61      | 436,364       | 122    | 123.4 | (34.9) | 217,463   | 115    | 115.7 | (33.7) | 218,901   | 129    | 131.0 | (34.4) | -14                         | -15.3 |
| 62-63      | 417,442       | 122    | 123.1 | (34.8) | 207,571   | 115    | 115.3 | (33.4) | 209,871   | 129    | 130.8 | (34.4) | -14                         | -15.5 |
| 64-65      | 315,933       | 121    | 122.3 | (34.7) | 158,935   | 114    | 114.6 | (33.3) | 156,998   | 128    | 130.1 | (34.3) | -14                         | -15.4 |
| 66-67      | 325,424       | 120    | 121.7 | (34.8) | 160,023   | 113    | 113.9 | (33.3) | 165,401   | 128    | 129.3 | (34.5) | -15                         | -15.4 |
| 68-69      | 341,410       | 120    | 121.1 | (34.7) | 168,480   | 112    | 113.2 | (33.1) | 172,930   | 127    | 128.8 | (34.6) | -15                         | -15.6 |
| 70-71      | 257,877       | 119    | 120.7 | (34.9) | 126,184   | 112    | 112.8 | (33.3) | 131,693   | 127    | 128.2 | (34.7) | -15                         | -15.4 |
| 72-73      | 211,973       | 119    | 120.4 | (34.8) | 102,586   | 112    | 112.5 | (32.9) | 109,387   | 126    | 127.8 | (34.9) | -14                         | -15.3 |
| 74-75      | 173,801       | 119    | 120.3 | (34.9) | 82,089    | 111    | 112.4 | (33.0) | 91,712    | 125    | 127.4 | (35.1) | -14                         | -15.1 |
| 76-77      | 126,103       | 119    | 120.5 | (34.8) | 57,223    | 111    | 112.6 | (32.9) | 68,880    | 125    | 127.0 | (35.0) | -14                         | -14.4 |
| 78-79      | 86,305        | 119    | 120.5 | (34.9) | 36,736    | 111    | 112.2 | (32.7) | 49,569    | 125    | 126.7 | (35.2) | -14                         | -14.5 |
| 80-81      | 56,623        | 118    | 120.4 | (34.8) | 23,429    | 110    | 111.8 | (32.1) | 33,194    | 125    | 126.5 | (35.3) | -15                         | -14.7 |
| 82-83      | 38,161        | 118    | 119.9 | (34.5) | 15,744    | 110    | 111.5 | (32.1) | 22,417    | 124    | 125.8 | (34.8) | -14                         | -14.2 |
| 84-85      | 21,901        | 116    | 118.6 | (35.0) | 9,230     | 109    | 110.8 | (32.3) | 12,671    | 122    | 124.2 | (35.9) | -13                         | -13.4 |
| 86-99      | 29,224        | 114    | 116.3 | (34.2) | 12,134    | 107    | 109.2 | (31.7) | 17,090    | 119    | 121.2 | (35.0) | -12                         | -12.0 |

LDL-C, low density lipoprotein cholesterol; SD, standard deviation.

<sup>a</sup> Concentration in women minus concentration in men.

Confidence interval of mean LDL-cholesterol levels in each sex and age group can be calculated by  $1.96 \times SD/\sqrt{n}$

The *p* values which were calculated by T-test between sexes, were <0.001 for each age group including those aged 22-23 years.

To convert cholesterol from mg/dL to mmol/L, multiply by 0.02586.

**Table S3. HRs<sup>a</sup> for mortality from CVD and its subtypes across 11 LDL-C categories (Including numerical version of Figure 4).**

| CVD subtypes           | LDL -C    |         | No. of Deaths | Crude rate per 10 <sup>6</sup> | Sex, and age adjusted <sup>b</sup> |                  | Multivariable adjusted <sup>c</sup> |                  |
|------------------------|-----------|---------|---------------|--------------------------------|------------------------------------|------------------|-------------------------------------|------------------|
|                        | mmol/L    | mg/dL   |               |                                | p-value                            | HR (95% CI)      | p-value                             | HR (95% CI)      |
| CVD                    | <1.42     | <55     | 3,217         | 1,023                          | <0.001                             | 1.61 (1.55-1.68) | <0.001                              | 1.33 (1.28-1.38) |
|                        | 1.42-1.80 | 55-69   | 4,365         | 696                            | <0.001                             | 1.29 (1.25-1.33) | <0.001                              | 1.19 (1.15-1.23) |
|                        | 1.81-2.19 | 70-84   | 8,309         | 603                            | <0.001                             | 1.13 (1.11-1.17) | <0.001                              | 1.09 (1.06-1.12) |
|                        | 2.20-2.58 | 85-99   | 12,748        | 594                            | 0.037                              | 1.03 (1.00-1.05) | 0.265                               | 1.01 (0.99-1.04) |
|                        | 2.59-2.96 | 100-114 | 15,770        | 641                            |                                    | 1.00 (Reference) |                                     | 1.00 (Reference) |
|                        | 2.97-3.35 | 115-129 | 15,922        | 704                            | 0.170                              | 1.02 (0.99-1.04) | 0.103                               | 1.02 (1.00-1.04) |
|                        | 3.36-3.74 | 130-144 | 12,763        | 753                            | 0.487                              | 1.01 (0.99-1.03) | 0.476                               | 1.01 (0.99-1.03) |
|                        | 3.75-4.13 | 145-159 | 9,072         | 830                            | <0.001                             | 1.05 (1.03-1.08) | <0.001                              | 1.05 (1.02-1.08) |
|                        | 4.14-4.52 | 160-174 | 5,737         | 940                            | <0.001                             | 1.15 (1.11-1.18) | <0.001                              | 1.13 (1.09-1.16) |
|                        | 4.53-4.90 | 175-189 | 3,126         | 1,013                          | <0.001                             | 1.20 (1.15-1.25) | <0.001                              | 1.17 (1.12-1.21) |
|                        | ≥4.91     | ≥190    | 3,315         | 1,242                          | <0.001                             | 1.43 (1.38-1.48) | <0.001                              | 1.34 (1.29-1.40) |
| Hypertension           | <1.42     | <55     | 199           | 63                             | <0.001                             | 1.49 (1.28-1.73) | 0.003                               | 1.26 (1.08-1.47) |
|                        | 1.42-1.80 | 55-69   | 335           | 53                             | <0.001                             | 1.40 (1.24-1.58) | <0.001                              | 1.32 (1.17-1.49) |
|                        | 1.81-2.19 | 70-84   | 587           | 43                             | 0.027                              | 1.12 (1.01-1.24) | 0.107                               | 1.09 (0.98-1.20) |
|                        | 2.20-2.58 | 85-99   | 934           | 44                             | 0.604                              | 1.02 (0.94-1.11) | 0.685                               | 1.02 (0.93-1.11) |
|                        | 2.59-2.96 | 100-114 | 1,174         | 48                             |                                    | 1.00 (Reference) |                                     | 1.00 (Reference) |
|                        | 2.97-3.35 | 115-129 | 1,110         | 49                             | 0.149                              | 0.94 (0.87-1.02) | 0.160                               | 0.94 (0.87-1.02) |
|                        | 3.36-3.74 | 130-144 | 942           | 56                             | 0.397                              | 0.96 (0.88-1.05) | 0.358                               | 0.96 (0.88-1.05) |
|                        | 3.75-4.13 | 145-159 | 646           | 59                             | 0.343                              | 0.95 (0.87-1.05) | 0.287                               | 0.95 (0.86-1.05) |
|                        | 4.14-4.52 | 160-174 | 399           | 65                             | 0.853                              | 0.99 (0.88-1.11) | 0.575                               | 0.97 (0.86-1.08) |
|                        | 4.53-4.90 | 175-189 | 222           | 72                             | 0.672                              | 1.03 (0.89-1.19) | 0.954                               | 1.00 (0.86-1.15) |
|                        | ≥4.91     | ≥190    | 244           | 91                             | 0.003                              | 1.24 (1.08-1.42) | 0.036                               | 1.16 (1.01-1.33) |
| Ischemic heart disease | <1.42     | <55     | 764           | 243                            | <0.001                             | 1.48 (1.37-1.60) | 0.017                               | 1.10 (1.02-1.19) |
|                        | 1.42-1.80 | 55-69   | 946           | 151                            | 0.005                              | 1.11 (1.03-1.19) | 0.746                               | 0.99 (0.92-1.06) |
|                        | 1.81-2.19 | 70-84   | 1,863         | 135                            | 0.479                              | 1.02 (0.97-1.08) | 0.287                               | 0.97 (0.92-1.03) |
|                        | 2.20-2.58 | 85-99   | 3,073         | 143                            | 0.922                              | 1.00 (0.96-1.05) | 0.642                               | 0.99 (0.94-1.04) |
|                        | 2.59-2.96 | 100-114 | 3,847         | 156                            |                                    | 1.00 (Reference) |                                     | 1.00 (Reference) |
|                        | 2.97-3.35 | 115-129 | 4,158         | 184                            | <0.001                             | 1.10 (1.05-1.15) | <0.001                              | 1.10 (1.05-1.15) |
|                        | 3.36-3.74 | 130-144 | 3,462         | 204                            | <0.001                             | 1.15 (1.10-1.20) | <0.001                              | 1.14 (1.09-1.20) |
|                        | 3.75-4.13 | 145-159 | 2,662         | 244                            | <0.001                             | 1.32 (1.26-1.39) | <0.001                              | 1.30 (1.23-1.36) |
|                        | 4.14-4.52 | 160-174 | 1,666         | 273                            | <0.001                             | 1.45 (1.37-1.53) | <0.001                              | 1.39 (1.31-1.47) |
|                        | 4.53-4.90 | 175-189 | 957           | 310                            | <0.001                             | 1.62 (1.51-1.74) | <0.001                              | 1.53 (1.42-1.64) |
|                        | ≥4.91     | ≥190    | 1,098         | 411                            | <0.001                             | 2.14 (2.00-2.29) | <0.001                              | 1.92 (1.80-2.06) |
| Myocardial infarction  | <1.42     | <55     | 551           | 175                            | <0.001                             | 1.45 (1.32-1.59) | 0.138                               | 1.07 (0.98-1.18) |
|                        | 1.42-1.80 | 55-69   | 717           | 114                            | 0.001                              | 1.14 (1.05-1.24) | 0.637                               | 1.02 (0.94-1.11) |
|                        | 1.81-2.19 | 70-84   | 1,357         | 98                             | 0.689                              | 1.01 (0.95-1.08) | 0.275                               | 0.96 (0.90-1.03) |
|                        | 2.20-2.58 | 85-99   | 2,266         | 106                            | 0.786                              | 1.01 (0.95-1.06) | 0.847                               | 0.99 (0.94-1.05) |

| CVD subtypes            | LDL -C    |         | No. of Deaths | Crude rate per 10 <sup>6</sup> | Sex, and age adjusted <sup>b</sup> |                  | Multivariable adjusted <sup>c</sup> |                  |
|-------------------------|-----------|---------|---------------|--------------------------------|------------------------------------|------------------|-------------------------------------|------------------|
|                         | mmol/L    | mg/dL   |               |                                | p-value                            | HR (95% CI)      | p-value                             | HR (95% CI)      |
|                         | 2.59-2.96 | 100-114 | 2,825         | 115                            |                                    | 1.00 (Reference) |                                     | 1.00 (Reference) |
|                         | 2.97-3.35 | 115-129 | 3,117         | 138                            | <0.001                             | 1.12 (1.06-1.18) | <0.001                              | 1.12 (1.06-1.18) |
|                         | 3.36-3.74 | 130-144 | 2,622         | 155                            | <0.001                             | 1.18 (1.12-1.25) | <0.001                              | 1.17 (1.11-1.24) |
|                         | 3.75-4.13 | 145-159 | 2,010         | 184                            | <0.001                             | 1.36 (1.28-1.44) | <0.001                              | 1.33 (1.25-1.40) |
|                         | 4.14-4.52 | 160-174 | 1,269         | 208                            | <0.001                             | 1.50 (1.40-1.60) | <0.001                              | 1.43 (1.34-1.53) |
|                         | 4.53-4.90 | 175-189 | 724           | 235                            | <0.001                             | 1.67 (1.53-1.81) | <0.001                              | 1.56 (1.44-1.70) |
|                         | ≥4.91     | ≥190    | 849           | 318                            | <0.001                             | 2.25 (2.08-2.43) | <0.001                              | 2.01 (1.86-2.17) |
| Stroke                  | <1.42     | <55     | 1,402         | 446                            | <0.001                             | 1.72 (1.62-1.82) | <0.001                              | 1.44 (1.36-1.53) |
|                         | 1.42-1.80 | 55-69   | 1,898         | 303                            | <0.001                             | 1.36 (1.29-1.43) | <0.001                              | 1.26 (1.20-1.33) |
|                         | 1.81-2.19 | 70-84   | 3,584         | 260                            | <0.001                             | 1.19 (1.14-1.23) | <0.001                              | 1.14 (1.09-1.19) |
|                         | 2.20-2.58 | 85-99   | 5,196         | 242                            | 0.709                              | 1.01 (0.97-1.04) | 0.753                               | 0.99 (0.96-1.03) |
|                         | 2.59-2.96 | 100-114 | 6,585         | 267                            |                                    | 1.00 (Reference) |                                     | 1.00 (Reference) |
|                         | 2.97-3.35 | 115-129 | 6,457         | 285                            | 0.238                              | 0.98 (0.95-1.01) | 0.372                               | 0.98 (0.95-1.02) |
|                         | 3.36-3.74 | 130-144 | 5,068         | 299                            | 0.003                              | 0.95 (0.91-0.98) | 0.006                               | 0.95 (0.92-0.99) |
|                         | 3.75-4.13 | 145-159 | 3,461         | 317                            | 0.006                              | 0.94 (0.91-0.98) | 0.008                               | 0.95 (0.91-0.99) |
|                         | 4.14-4.52 | 160-174 | 2,183         | 358                            | 0.449                              | 1.02 (0.97-1.07) | 0.707                               | 1.01 (0.96-1.06) |
|                         | 4.53-4.90 | 175-189 | 1,099         | 356                            | 0.498                              | 0.98 (0.92-1.04) | 0.226                               | 0.96 (0.90-1.02) |
|                         | ≥4.91     | ≥190    | 1,152         | 432                            | <0.001                             | 1.14 (1.07-1.21) | 0.009                               | 1.09 (1.02-1.16) |
| Hemorrhagic stroke      | <1.42     | <55     | 677           | 215                            | <0.001                             | 2.11 (1.94-2.30) | <0.001                              | 1.77 (1.62-1.93) |
|                         | 1.42-1.80 | 55-69   | 915           | 146                            | <0.001                             | 1.67 (1.55-1.80) | <0.001                              | 1.54 (1.42-1.66) |
|                         | 1.81-2.19 | 70-84   | 1,566         | 114                            | <0.001                             | 1.30 (1.22-1.38) | <0.001                              | 1.25 (1.17-1.33) |
|                         | 2.20-2.58 | 85-99   | 2,122         | 99                             | 0.262                              | 1.03 (0.98-1.09) | 0.498                               | 1.02 (0.96-1.08) |
|                         | 2.59-2.96 | 100-114 | 2,625         | 107                            |                                    | 1.00 (Reference) |                                     | 1.00 (Reference) |
|                         | 2.97-3.35 | 115-129 | 2,528         | 112                            | 0.115                              | 0.96 (0.91-1.01) | 0.156                               | 0.96 (0.91-1.02) |
|                         | 3.36-3.74 | 130-144 | 1,939         | 114                            | <0.001                             | 0.90 (0.85-0.96) | <0.001                              | 0.90 (0.85-0.96) |
|                         | 3.75-4.13 | 145-159 | 1,247         | 114                            | <0.001                             | 0.85 (0.79-0.91) | <0.001                              | 0.85 (0.79-0.90) |
|                         | 4.14-4.52 | 160-174 | 784           | 129                            | 0.023                              | 0.91 (0.84-0.99) | 0.011                               | 0.90 (0.83-0.98) |
|                         | 4.53-4.90 | 175-189 | 397           | 129                            | 0.017                              | 0.88 (0.79-0.98) | 0.006                               | 0.86 (0.78-0.96) |
|                         | ≥4.91     | ≥190    | 378           | 142                            | 0.192                              | 0.93 (0.84-1.04) | 0.027                               | 0.89 (0.79-0.99) |
| Subarachnoid hemorrhage | <1.42     | <55     | 176           | 56                             | <0.001                             | 1.72 (1.47-2.03) | <0.001                              | 1.46 (1.24-1.73) |
|                         | 1.42-1.80 | 55-69   | 289           | 46                             | <0.001                             | 1.55 (1.36-1.77) | <0.001                              | 1.45 (1.27-1.66) |
|                         | 1.81-2.19 | 70-84   | 488           | 35                             | 0.008                              | 1.16 (1.04-1.29) | 0.031                               | 1.13 (1.01-1.26) |
|                         | 2.20-2.58 | 85-99   | 732           | 34                             | 0.705                              | 1.02 (0.92-1.12) | 0.786                               | 1.01 (0.92-1.12) |
|                         | 2.59-2.96 | 100-114 | 915           | 37                             |                                    | 1.00 (Reference) |                                     | 1.00 (Reference) |
|                         | 2.97-3.35 | 115-129 | 935           | 41                             | 0.723                              | 1.02 (0.93-1.11) | 0.773                               | 1.01 (0.93-1.11) |
|                         | 3.36-3.74 | 130-144 | 761           | 45                             | 0.711                              | 1.02 (0.92-1.12) | 0.899                               | 1.01 (0.91-1.11) |
|                         | 3.75-4.13 | 145-159 | 528           | 48                             | 0.645                              | 1.03 (0.92-1.14) | 0.895                               | 1.01 (0.90-1.12) |
|                         | 4.14-4.52 | 160-174 | 324           | 53                             | 0.295                              | 1.07 (0.94-1.22) | 0.537                               | 1.04 (0.92-1.18) |

| CVD subtypes             | LDL -C    |         | No. of Deaths | Crude rate per 10 <sup>6</sup> | Sex, and age adjusted <sup>b</sup> |                  | Multivariable adjusted <sup>c</sup> |                  |
|--------------------------|-----------|---------|---------------|--------------------------------|------------------------------------|------------------|-------------------------------------|------------------|
|                          | mmol/L    | mg/dL   |               |                                | p-value                            | HR (95% CI)      | p-value                             | HR (95% CI)      |
| Intracerebral hemorrhage | 4.53-4.90 | 175-189 | 164           | 53                             | 0.773                              | 1.02 (0.87-1.21) | 0.889                               | 0.99 (0.84-1.17) |
|                          | ≥4.91     | ≥190    | 149           | 56                             | 0.804                              | 1.02 (0.86-1.22) | 0.691                               | 0.97 (0.81-1.15) |
|                          | <1.42     | <55     | 501           | 159                            | <0.001                             | 2.29 (2.07-2.53) | <0.001                              | 1.87 (1.69-2.08) |
|                          | 1.42-1.80 | 55-69   | 626           | 100                            | <0.001                             | 1.71 (1.56-1.87) | <0.001                              | 1.56 (1.42-1.71) |
|                          | 1.81-2.19 | 70-84   | 1,078         | 78                             | <0.001                             | 1.36 (1.26-1.47) | <0.001                              | 1.29 (1.20-1.40) |
|                          | 2.20-2.58 | 85-99   | 1,390         | 65                             | 0.344                              | 1.03 (0.96-1.11) | 0.634                               | 1.02 (0.95-1.09) |
|                          | 2.59-2.96 | 100-114 | 1,710         | 69                             |                                    | 1.00 (Reference) |                                     | 1.00 (Reference) |
|                          | 2.97-3.35 | 115-129 | 1,593         | 70                             | 0.040                              | 0.93 (0.87-1.00) | 0.066                               | 0.94 (0.88-1.00) |
|                          | 3.36-3.74 | 130-144 | 1,178         | 69                             | <0.001                             | 0.85 (0.79-0.92) | <0.001                              | 0.86 (0.80-0.92) |
|                          | 3.75-4.13 | 145-159 | 719           | 66                             | <0.001                             | 0.76 (0.70-0.83) | <0.001                              | 0.77 (0.70-0.84) |
|                          | 4.14-4.52 | 160-174 | 460           | 75                             | 0.001                              | 0.84 (0.76-0.93) | <0.001                              | 0.84 (0.75-0.93) |
|                          | 4.53-4.90 | 175-189 | 233           | 75                             | 0.004                              | 0.82 (0.71-0.94) | 0.002                               | 0.81 (0.70-0.93) |
| ≥4.91                    | ≥190      | 229     | 86            | 0.155                          | 0.90 (0.79-1.04)                   | 0.033            | 0.86 (0.75-0.99)                    |                  |
| Ischemic stroke          | <1.42     | <55     | 361           | 115                            | <0.001                             | 1.42 (1.27-1.59) | 0.005                               | 1.18 (1.05-1.32) |
|                          | 1.42-1.80 | 55-69   | 477           | 76                             | 0.064                              | 1.10 (0.99-1.21) | 0.759                               | 1.02 (0.92-1.12) |
|                          | 1.81-2.19 | 70-84   | 1,017         | 74                             | 0.026                              | 1.09 (1.01-1.17) | 0.243                               | 1.05 (0.97-1.13) |
|                          | 2.20-2.58 | 85-99   | 1,548         | 72                             | 0.408                              | 0.97 (0.91-1.04) | 0.230                               | 0.96 (0.90-1.03) |
|                          | 2.59-2.96 | 100-114 | 2,019         | 82                             |                                    | 1.00 (Reference) |                                     | 1.00 (Reference) |
|                          | 2.97-3.35 | 115-129 | 1,997         | 88                             | 0.933                              | 1.00 (0.94-1.06) | 0.941                               | 1.00 (0.94-1.07) |
|                          | 3.36-3.74 | 130-144 | 1,659         | 98                             | 0.476                              | 1.02 (0.96-1.09) | 0.393                               | 1.03 (0.96-1.10) |
|                          | 3.75-4.13 | 145-159 | 1,211         | 111                            | 0.010                              | 1.10 (1.02-1.18) | 0.009                               | 1.10 (1.02-1.18) |
|                          | 4.14-4.52 | 160-174 | 767           | 126                            | <0.001                             | 1.19 (1.10-1.30) | <0.001                              | 1.18 (1.08-1.28) |
|                          | 4.53-4.90 | 175-189 | 368           | 119                            | 0.113                              | 1.09 (0.98-1.22) | 0.217                               | 1.07 (0.96-1.20) |
|                          | ≥4.91     | ≥190    | 421           | 158                            | <0.001                             | 1.40 (1.26-1.55) | <0.001                              | 1.33 (1.20-1.48) |
| Heart failure            | <1.42     | <55     | 201           | 64                             | <0.001                             | 1.70 (1.46-1.98) | <0.001                              | 1.58 (1.36-1.85) |
|                          | 1.42-1.80 | 55-69   | 297           | 47                             | <0.001                             | 1.41 (1.24-1.60) | <0.001                              | 1.36 (1.19-1.54) |
|                          | 1.81-2.19 | 70-84   | 532           | 39                             | 0.009                              | 1.15 (1.04-1.28) | 0.042                               | 1.11 (1.00-1.24) |
|                          | 2.20-2.58 | 85-99   | 890           | 41                             | 0.028                              | 1.11 (1.01-1.21) | 0.053                               | 1.09 (1.00-1.19) |
|                          | 2.59-2.96 | 100-114 | 1,035         | 42                             |                                    | 1.00 (Reference) |                                     | 1.00 (Reference) |
|                          | 2.97-3.35 | 115-129 | 969           | 43                             | 0.115                              | 0.93 (0.85-1.02) | 0.167                               | 0.94 (0.86-1.03) |
|                          | 3.36-3.74 | 130-144 | 748           | 44                             | 0.003                              | 0.87 (0.79-0.95) | 0.008                               | 0.88 (0.80-0.97) |
|                          | 3.75-4.13 | 145-159 | 515           | 47                             | 0.007                              | 0.86 (0.78-0.96) | 0.020                               | 0.88 (0.79-0.98) |
|                          | 4.14-4.52 | 160-174 | 392           | 64                             | 0.093                              | 1.11 (0.98-1.24) | 0.062                               | 1.12 (0.99-1.26) |
|                          | 4.53-4.90 | 175-189 | 190           | 62                             | 0.954                              | 1.00 (0.86-1.17) | 0.880                               | 1.01 (0.87-1.18) |
|                          | ≥4.91     | ≥190    | 209           | 78                             | 0.014                              | 1.21 (1.04-1.40) | 0.014                               | 1.21 (1.04-1.40) |
| Sudden cardiac death     | <1.42     | <55     | 299           | 95                             | <0.001                             | 1.71 (1.51-1.94) | <0.001                              | 1.38 (1.21-1.57) |
|                          | 1.42-1.80 | 55-69   | 404           | 64                             | <0.001                             | 1.39 (1.25-1.56) | <0.001                              | 1.27 (1.13-1.42) |
|                          | 1.81-2.19 | 70-84   | 779           | 57                             | <0.001                             | 1.25 (1.15-1.37) | <0.001                              | 1.20 (1.09-1.31) |



| CVD subtypes | LDL -C    |         | No. of Deaths | Crude rate per 10 <sup>6</sup> | Sex, and age adjusted <sup>b</sup> |                  | Multivariable adjusted <sup>c</sup> |                  |
|--------------|-----------|---------|---------------|--------------------------------|------------------------------------|------------------|-------------------------------------|------------------|
|              | mmol/L    | mg/dL   |               |                                | p-value                            | HR (95% CI)      | p-value                             | HR (95% CI)      |
|              | 2.20-2.58 | 85-99   | 1,136         | 53                             | 0.027                              | 1.09 (1.01-1.18) | 0.067                               | 1.08 (0.99-1.17) |
|              | 2.59-2.96 | 100-114 | 1,300         | 53                             |                                    | 1.00 (Reference) |                                     | 1.00 (Reference) |
|              | 2.97-3.35 | 115-129 | 1,387         | 61                             | 0.036                              | 1.08 (1.01-1.17) | 0.026                               | 1.09 (1.01-1.18) |
|              | 3.36-3.74 | 130-144 | 1,083         | 64                             | 0.118                              | 1.07 (0.98-1.16) | 0.097                               | 1.07 (0.99-1.16) |
|              | 3.75-4.13 | 145-159 | 780           | 71                             | 0.002                              | 1.15 (1.05-1.26) | 0.002                               | 1.15 (1.05-1.25) |
|              | 4.14-4.52 | 160-174 | 472           | 77                             | <0.001                             | 1.22 (1.10-1.35) | <0.001                              | 1.20 (1.08-1.33) |
|              | 4.53-4.90 | 175-189 | 282           | 91                             | <0.001                             | 1.42 (1.25-1.62) | <0.001                              | 1.38 (1.21-1.57) |
|              | ≥4.91     | ≥190    | 255           | 96                             | <0.001                             | 1.48 (1.30-1.70) | <0.001                              | 1.39 (1.22-1.59) |

CI, confidence interval; HR, hazard ratio; LDL-C, low density lipoprotein-cholesterol

<sup>a</sup> HRs were calculated by Cox models after adjustment for risk factors.

<sup>b</sup> Adjustment for age at baseline, and sex

<sup>c</sup> Adjustment for age at baseline, sex, smoking status, alcohol use, physical activity, household income, body mass index, systolic blood pressure, fasting glucose, triglyceride and high density lipoprotein-cholesterol.

To convert LDL-C from mg/dL to mmol/L, multiply by 0.02586.

**Table S4. HRs<sup>a</sup> per each 39 mg/dL (1 mmol/L) increase in LDL-C for deaths from CVD and subtypes according to LDL-C range and sex**

| LDL-C range           | CVD subtypes             | Total        |         |                  | Men          |         |                  | <i>P</i> <sub>interaction (sex)</sub> | Women        |         |                  |
|-----------------------|--------------------------|--------------|---------|------------------|--------------|---------|------------------|---------------------------------------|--------------|---------|------------------|
|                       |                          | No. of death | p-value | HR (95% CI)      | No. of death | p-value | HR (95% CI)      |                                       | No. of death | p-value | HR (95% CI)      |
| LDL-C < 100 mg/dL     |                          |              |         |                  |              |         |                  |                                       |              |         |                  |
| < 2.59 mmol/L         | CVD                      | 28,639       | <0.001  | 0.78 (0.76-0.81) | 19,593       | <0.001  | 0.78 (0.76-0.80) | 0.796                                 | 9,046        | <0.001  | 0.79 (0.75-0.83) |
| (Total, n=5,051,377)  | Hypertension             | 2,055        | <0.001  | 0.76 (0.68-0.84) | 1,199        | <0.001  | 0.74 (0.66-0.84) | 0.693                                 | 856          | 0.003   | 0.78 (0.66-0.92) |
| (Men, n= 2,720,544)   | Ischemic heart disease   | 6,646        | <0.001  | 0.89 (0.85-0.95) | 5,000        | 0.001   | 0.90 (0.85-0.96) | 0.229                                 | 1,646        | 0.002   | 0.83 (0.74-0.93) |
| (Women, n= 2,330,833) | Myocardial infarction    | 4,891        | 0.004   | 0.91 (0.85-0.97) | 3,685        | 0.011   | 0.91 (0.85-0.98) | 0.625                                 | 1,206        | 0.063   | 0.88 (0.76-1.01) |
|                       | Stroke                   | 12,080       | <0.001  | 0.74 (0.71-0.77) | 8,048        | <0.001  | 0.73 (0.70-0.77) | 0.286                                 | 4,032        | <0.001  | 0.77 (0.71-0.83) |
|                       | Hemorrhagic stroke       | 5,280        | <0.001  | 0.65 (0.61-0.69) | 3,432        | <0.001  | 0.62 (0.58-0.67) | 0.042                                 | 1,848        | <0.001  | 0.71 (0.64-0.80) |
|                       | Subarachnoid hemorrhage  | 1,685        | <0.001  | 0.75 (0.67-0.84) | 844          | <0.001  | 0.74 (0.64-0.86) | 0.809                                 | 841          | <0.001  | 0.72 (0.61-0.85) |
|                       | Intracerebral hemorrhage | 3,595        | <0.001  | 0.62 (0.58-0.66) | 2,588        | <0.001  | 0.59 (0.55-0.64) | 0.032                                 | 1,007        | <0.001  | 0.71 (0.61-0.83) |
|                       | Ischemic stroke          | 3,403        | <0.001  | 0.86 (0.79-0.93) | 2,328        | 0.002   | 0.86 (0.79-0.95) | 0.948                                 | 1,075        | 0.050   | 0.86 (0.74-1.00) |
|                       | Heart failure            | 1,920        | <0.001  | 0.71 (0.64-0.79) | 1,116        | <0.001  | 0.71 (0.62-0.81) | 0.970                                 | 804          | <0.001  | 0.71 (0.60-0.84) |
|                       | Sudden cardiac death     | 2,618        | <0.001  | 0.81 (0.74-0.88) | 2,016        | <0.001  | 0.79 (0.71-0.87) | 0.402                                 | 602          | 0.156   | 0.86 (0.71-1.06) |
| LDL-C 100-300 mg/dL   |                          |              |         |                  |              |         |                  |                                       |              |         |                  |
| 2.59-7.76 mmol/L      | CVD                      | 65,656       | <0.001  | 1.10 (1.09-1.11) | 36,439       | <0.001  | 1.16 (1.14-1.18) | <0.001                                | 29,217       | <0.001  | 1.04 (1.02-1.05) |
| (Total, n=9,830,896)  | Hypertension             | 4,736        | 0.467   | 1.02 (0.97-1.06) | 1,941        | 0.306   | 1.04 (0.97-1.11) | 0.414                                 | 2,795        | 0.984   | 1.00 (0.95-1.05) |
| (Men, n= 5,117,327)   | Ischemic heart disease   | 17,827       | <0.001  | 1.26 (1.24-1.29) | 11,517       | <0.001  | 1.31 (1.27-1.34) | <0.001                                | 6,310        | <0.001  | 1.18 (1.14-1.22) |
| (Women, n= 4,713,569) | Myocardial infarction    | 13,397       | <0.001  | 1.28 (1.25-1.31) | 8,677        | <0.001  | 1.32 (1.28-1.36) | <0.001                                | 4,720        | <0.001  | 1.20 (1.15-1.24) |
|                       | Stroke                   | 25,994       | 0.266   | 1.01 (0.99-1.03) | 13,452       | <0.001  | 1.05 (1.02-1.08) | <0.001                                | 12,542       | 0.101   | 0.98 (0.96-1.00) |
|                       | Hemorrhagic stroke       | 9,893        | <0.001  | 0.93 (0.90-0.96) | 4,800        | 0.026   | 0.95 (0.91-0.99) | 0.216                                 | 5,093        | <0.001  | 0.91 (0.88-0.95) |
|                       | Subarachnoid hemorrhage  | 3,773        | 0.935   | 1.00 (0.96-1.05) | 1,421        | 0.798   | 1.01 (0.93-1.10) | 0.505                                 | 2,352        | 0.427   | 0.98 (0.92-1.04) |
|                       | Intracerebral hemorrhage | 6,120        | <0.001  | 0.90 (0.86-0.93) | 3,379        | 0.007   | 0.93 (0.88-0.98) | 0.088                                 | 2,741        | <0.001  | 0.86 (0.82-0.91) |

| LDL-C range           | CVD subtypes             | Total        |         |                  | Men          |         |                  | <i>P</i> <sub>interaction (sex)</sub> | Women        |         |                  |
|-----------------------|--------------------------|--------------|---------|------------------|--------------|---------|------------------|---------------------------------------|--------------|---------|------------------|
|                       |                          | No. of death | p-value | HR (95% CI)      | No. of death | p-value | HR (95% CI)      |                                       | No. of death | p-value | HR (95% CI)      |
|                       | Ischemic stroke          | 8,439        | <0.001  | 1.11 (1.07-1.14) | 4,572        | <0.001  | 1.16 (1.11-1.21) | 0.002                                 | 3,867        | 0.014   | 1.06 (1.01-1.10) |
|                       | Heart failure            | 4,054        | 0.034   | 1.05 (1.00-1.10) | 1,701        | 0.047   | 1.08 (1.00-1.16) | 0.364                                 | 2,353        | 0.252   | 1.03 (0.98-1.09) |
|                       | Sudden cardiac death     | 5,554        | <0.001  | 1.13 (1.08-1.17) | 3,591        | <0.001  | 1.18 (1.13-1.24) | <0.001                                | 1,963        | 0.429   | 1.02 (0.96-1.09) |
| LDL-C ≤ 300 mg/dL     |                          |              |         |                  |              |         |                  |                                       |              |         |                  |
| ≤ 7.76 mmol/L         | CVD                      | 94,295       | 0.011   | 1.01 (1.00-1.02) | 56,032       | <0.001  | 1.03 (1.02-1.04) | <0.001                                | 38,263       | <0.001  | 0.98 (0.97-0.99) |
| (Total, n=14,882,273) | Hypertension             | 6,791        | <0.001  | 0.95 (0.93-0.98) | 3,140        | <0.001  | 0.93 (0.89-0.97) | 0.163                                 | 3,651        | 0.068   | 0.97 (0.93-1.00) |
| (Men, n= 7,837,871)   | Ischemic heart disease   | 24,473       | <0.001  | 1.17 (1.16-1.19) | 16,517       | <0.001  | 1.19 (1.17-1.21) | <0.001                                | 7,956        | <0.001  | 1.11 (1.09-1.14) |
| (Women, n= 7,044,402) | Myocardial infarction    | 18,288       | <0.001  | 1.19 (1.17-1.21) | 12,362       | <0.001  | 1.21 (1.18-1.23) | <0.001                                | 5,926        | <0.001  | 1.13 (1.10-1.16) |
|                       | Stroke                   | 38,074       | <0.001  | 0.94 (0.93-0.95) | 21,500       | <0.001  | 0.94 (0.93-0.96) | 0.854                                 | 16,574       | <0.001  | 0.94 (0.92-0.95) |
|                       | Hemorrhagic stroke       | 15,173       | <0.001  | 0.84 (0.83-0.86) | 8,232        | <0.001  | 0.81 (0.79-0.84) | <0.001                                | 6,941        | <0.001  | 0.87 (0.85-0.89) |
|                       | Subarachnoid hemorrhage  | 5,458        | <0.001  | 0.93 (0.90-0.96) | 2,265        | <0.001  | 0.92 (0.87-0.96) | 0.972                                 | 3,193        | <0.001  | 0.92 (0.88-0.95) |
|                       | Intracerebral hemorrhage | 9,715        | <0.001  | 0.80 (0.79-0.82) | 5,967        | <0.001  | 0.78 (0.75-0.80) | 0.003                                 | 3,748        | <0.001  | 0.84 (0.81-0.87) |
|                       | Ischemic stroke          | 11,842       | <0.001  | 1.05 (1.03-1.07) | 6,900        | <0.001  | 1.07 (1.05-1.10) | 0.016                                 | 4,942        | 0.191   | 1.02 (0.99-1.05) |
|                       | Heart failure            | 5,974        | <0.001  | 0.93 (0.90-0.96) | 2,817        | <0.001  | 0.92 (0.88-0.96) | 0.387                                 | 3,157        | 0.003   | 0.94 (0.90-0.98) |
|                       | Sudden cardiac death     | 8,172        | 0.389   | 1.01 (0.99-1.04) | 5,607        | 0.401   | 1.01 (0.98-1.04) | 0.151                                 | 2,565        | 0.244   | 0.97 (0.93-1.02) |

CI, confidence interval; HR, hazard ratio; LDL-C, low density lipoprotein-cholesterol;

<sup>a</sup> HRs were calculated by Cox models, after adjustment for age at baseline, sex, smoking status, alcohol use, physical activity, household income, body mass index, systolic blood pressure, fasting glucose, triglyceride, and high density lipoprotein-cholesterol.

To convert LDL-C from mg/dL to mmol/L, multiply by 0.02586

**Table S5. HRs<sup>a</sup> per each 39 mg/dL (1 mmol/L) increase in LDL-C for deaths from CVD and subtypes according to LDL-C range and age**

| CVD subtypes<br>(ICD10) | Age group,<br>Years | LDL-C<100 mg/dL<br>(n=5,051,377) |         |                  |                                       | 100-300 mg/dL<br>(n=9,830,896) |         |                  |                                       | LDL-C ≤ 300 mg/dL<br>(n=14,882,273) |         |                  |                                       |
|-------------------------|---------------------|----------------------------------|---------|------------------|---------------------------------------|--------------------------------|---------|------------------|---------------------------------------|-------------------------------------|---------|------------------|---------------------------------------|
|                         |                     | No. of death                     | p-value | HR (95% CI)      | <i>P</i> <sub>interaction (age)</sub> | No. of death                   | p-value | HR (95% CI)      | <i>P</i> <sub>interaction (age)</sub> | No. of death                        | p-value | HR (95% CI)      | <i>P</i> <sub>interaction (age)</sub> |
| CVD                     | 18-99               | 28,639                           | <0.001  | 0.78 (0.76-0.81) |                                       | 65,656                         | <0.001  | 1.10 (1.09-1.11) |                                       | 94,295                              | 0.011   | 1.01 (1.00-1.02) |                                       |
|                         | 18-44               | 1,906                            | <0.001  | 0.76 (0.69-0.84) | <0.001                                | 3,577                          | <0.001  | 1.24 (1.18-1.30) | <0.001                                | 5,483                               | <0.001  | 1.11 (1.07-1.14) | <0.001                                |
|                         | 45-64               | 7,028                            | <0.001  | 0.73 (0.69-0.77) |                                       | 15,433                         | <0.001  | 1.14 (1.11-1.17) |                                       | 22,461                              | 0.304   | 1.01 (0.99-1.02) |                                       |
|                         | 65-74               | 9,715                            | <0.001  | 0.80 (0.76-0.83) |                                       | 22,516                         | <0.001  | 1.10 (1.08-1.13) |                                       | 32,231                              | 0.036   | 1.01 (1.00-1.03) |                                       |
|                         | 75-84               | 8,166                            | <0.001  | 0.85 (0.81-0.90) |                                       | 20,234                         | <0.001  | 1.06 (1.04-1.08) |                                       | 28,400                              | 0.921   | 1.00 (0.99-1.01) |                                       |
|                         | 85-99               | 1,824                            | 0.005   | 0.85 (0.75-0.95) |                                       | 3,896                          | 0.941   | 1.00 (0.95-1.05) |                                       | 5,720                               | 0.019   | 0.96 (0.93-0.99) |                                       |
| Hypertension            | 18-99               | 2,055                            | <0.001  | 0.76 (0.68-0.84) |                                       | 4,736                          | 0.467   | 1.02 (0.97-1.06) |                                       | 6,791                               | <0.001  | 0.95 (0.93-0.98) |                                       |
|                         | 18-44               | 27                               | 0.856   | 0.93 (0.41-2.10) | 0.895                                 | 58                             | 0.113   | 1.33 (0.93-1.90) | 0.423                                 | 85                                  | 0.108   | 1.21 (0.96-1.53) | 0.084                                 |
|                         | 45-64               | 275                              | 0.020   | 0.74 (0.58-0.95) |                                       | 498                            | 0.927   | 0.99 (0.87-1.13) |                                       | 773                                 | 0.010   | 0.90 (0.83-0.98) |                                       |
|                         | 65-74               | 604                              | <0.001  | 0.73 (0.61-0.87) |                                       | 1,435                          | 0.187   | 1.05 (0.98-1.13) |                                       | 2,039                               | 0.496   | 0.98 (0.93-1.03) |                                       |
|                         | 75-84               | 849                              | 0.003   | 0.78 (0.66-0.92) |                                       | 2,126                          | 0.971   | 1.00 (0.94-1.06) |                                       | 2,975                               | 0.031   | 0.96 (0.92-1.00) |                                       |
|                         | 85-99               | 300                              | 0.282   | 0.85 (0.64-1.14) |                                       | 619                            | 0.664   | 0.97 (0.87-1.10) |                                       | 919                                 | 0.033   | 0.92 (0.85-0.99) |                                       |
| Ischemic heart disease  | 18-99               | 6,646                            | <0.001  | 0.89 (0.85-0.95) |                                       | 17,827                         | <0.001  | 1.26 (1.24-1.29) |                                       | 24,473                              | <0.001  | 1.17 (1.16-1.19) |                                       |
|                         | 18-44               | 409                              | 0.734   | 1.04 (0.83-1.29) | 0.653                                 | 1,194                          | <0.001  | 1.50 (1.39-1.62) | <0.001                                | 1,603                               | <0.001  | 1.44 (1.37-1.52) | <0.001                                |
|                         | 45-64               | 1,933                            | 0.011   | 0.88 (0.80-0.97) |                                       | 5,221                          | <0.001  | 1.35 (1.30-1.40) |                                       | 7,154                               | <0.001  | 1.22 (1.19-1.25) |                                       |
|                         | 65-74               | 2,271                            | 0.005   | 0.88 (0.80-0.96) |                                       | 5,945                          | <0.001  | 1.24 (1.20-1.29) |                                       | 8,216                               | <0.001  | 1.15 (1.12-1.17) |                                       |
|                         | 75-84               | 1,670                            | 0.218   | 0.93 (0.83-1.04) |                                       | 4,621                          | <0.001  | 1.16 (1.11-1.20) |                                       | 6,291                               | <0.001  | 1.10 (1.07-1.13) |                                       |
|                         | 85-99               | 363                              | 0.376   | 0.89 (0.68-1.16) |                                       | 846                            | 0.197   | 1.07 (0.97-1.18) |                                       | 1,209                               | 0.291   | 1.04 (0.97-1.11) |                                       |
| Myocardial infarction   | 18-99               | 4,891                            | 0.004   | 0.91 (0.85-0.97) |                                       | 13,397                         | <0.001  | 1.28 (1.25-1.31) |                                       | 18,288                              | <0.001  | 1.19 (1.17-1.21) |                                       |
|                         | 18-44               | 279                              | 0.541   | 1.09 (0.83-1.42) | 0.545                                 | 828                            | <0.001  | 1.51 (1.38-1.65) | <0.001                                | 1,107                               | <0.001  | 1.45 (1.36-1.55) | <0.001                                |
|                         | 45-64               | 1,422                            | 0.142   | 0.92 (0.82-1.03) |                                       | 4,015                          | <0.001  | 1.36 (1.31-1.42) |                                       | 5,437                               | <0.001  | 1.25 (1.21-1.28) |                                       |

| CVD subtypes<br>(ICD10)  | Age group,<br>Years | LDL-C<100 mg/dL<br>(n=5,051,377) |                  |                  |                                       | 100-300 mg/dL<br>(n=9,830,896) |                  |                  |                                       | LDL-C ≤ 300 mg/dL<br>(n=14,882,273) |                  |                  |                                       |
|--------------------------|---------------------|----------------------------------|------------------|------------------|---------------------------------------|--------------------------------|------------------|------------------|---------------------------------------|-------------------------------------|------------------|------------------|---------------------------------------|
|                          |                     | No. of death                     | p-value          | HR (95% CI)      | <i>P</i> <sub>interaction (age)</sub> | No. of death                   | p-value          | HR (95% CI)      | <i>P</i> <sub>interaction (age)</sub> | No. of death                        | p-value          | HR (95% CI)      | <i>P</i> <sub>interaction (age)</sub> |
| Stroke                   | 65-74               | 1,706                            | 0.007            | 0.86 (0.78-0.96) |                                       | 4,618                          | <0.001           | 1.25 (1.20-1.30) |                                       | 6,324                               | <0.001           | 1.16 (1.13-1.19) |                                       |
|                          | 75-84               | 1,233                            | 0.466            | 0.95 (0.83-1.09) |                                       | 3,348                          | <0.001           | 1.17 (1.12-1.23) |                                       | 4,581                               | <0.001           | 1.11 (1.07-1.14) |                                       |
|                          | 85-99               | 251                              | 0.697            | 0.94 (0.68-1.29) |                                       | 588                            | 0.031            | 1.14 (1.01-1.28) |                                       | 839                                 | 0.130            | 1.06 (0.98-1.15) |                                       |
|                          | 18-99               | 12,080                           | <0.001           | 0.74 (0.71-0.77) |                                       | 25,994                         | 0.266            | 1.01 (0.99-1.03) |                                       | 38,074                              | <0.001           | 0.94 (0.93-0.95) |                                       |
|                          | 18-44               | 863                              | <0.001           | 0.67 (0.58-0.78) | <0.001                                | 1,286                          | 0.074            | 1.08 (0.99-1.18) | 0.056                                 | 2,149                               | 0.006            | 0.93 (0.88-0.98) | <0.001                                |
|                          | 45-64               | 2,938                            | <0.001           | 0.67 (0.62-0.72) |                                       | 5,703                          | 0.136            | 0.97 (0.93-1.01) |                                       | 8,641                               | <0.001           | 0.87 (0.85-0.89) |                                       |
|                          | 65-74               | 4,253                            | <0.001           | 0.77 (0.72-0.82) |                                       | 9,311                          | 0.018            | 1.04 (1.01-1.07) |                                       | 13,564                              | <0.001           | 0.96 (0.94-0.98) |                                       |
| 75-84                    | 3,395               | <0.001                           | 0.85 (0.78-0.92) |                  | 8,287                                 | 0.578                          | 1.01 (0.98-1.04) |                  | 11,682                                | 0.033                               | 0.98 (0.96-1.00) |                  |                                       |
| 85-99                    | 631                 | 0.008                            | 0.77 (0.63-0.93) |                  | 1,407                                 | 0.928                          | 1.00 (0.93-1.09) |                  | 2,038                                 | 0.524                               | 0.98 (0.93-1.04) |                  |                                       |
| Hemorrhagic stroke       | 18-99               | 5,280                            | <0.001           | 0.65 (0.61-0.69) |                                       | 9,893                          | <0.001           | 0.93 (0.90-0.96) |                                       | 15,173                              | <0.001           | 0.84 (0.83-0.86) |                                       |
|                          | 18-44               | 759                              | <0.001           | 0.65 (0.56-0.76) | 0.009                                 | 1,067                          | 0.363            | 1.05 (0.95-1.15) | 0.121                                 | 1,826                               | <0.001           | 0.89 (0.84-0.94) | 0.002                                 |
|                          | 45-64               | 1,915                            | <0.001           | 0.59 (0.54-0.65) |                                       | 3,526                          | 0.003            | 0.93 (0.88-0.97) |                                       | 5,441                               | <0.001           | 0.81 (0.79-0.84) |                                       |
|                          | 65-74               | 1,557                            | <0.001           | 0.66 (0.59-0.74) |                                       | 3,039                          | <0.001           | 0.90 (0.86-0.96) |                                       | 4,596                               | <0.001           | 0.83 (0.80-0.86) |                                       |
|                          | 75-84               | 932                              | 0.011            | 0.82 (0.70-0.95) |                                       | 2,041                          | 0.021            | 0.93 (0.87-0.99) |                                       | 2,973                               | <0.001           | 0.89 (0.85-0.93) |                                       |
|                          | 85-99               | 117                              | 0.222            | 0.75 (0.48-1.19) |                                       | 220                            | 0.967            | 1.00 (0.82-1.23) |                                       | 337                                 | 0.165            | 0.91 (0.80-1.04) |                                       |
| Subarachnoid hemorrhage  | 18-99               | 1,685                            | <0.001           | 0.75 (0.67-0.84) |                                       | 3,773                          | 0.935            | 1.00 (0.96-1.05) |                                       | 5,458                               | <0.001           | 0.93 (0.90-0.96) |                                       |
|                          | 18-44               | 438                              | <0.001           | 0.69 (0.56-0.85) | 0.568                                 | 614                            | 0.392            | 1.06 (0.93-1.20) | 0.161                                 | 1,052                               | 0.007            | 0.90 (0.84-0.97) | 0.127                                 |
|                          | 45-64               | 726                              | 0.017            | 0.81 (0.69-0.96) |                                       | 1,685                          | 0.310            | 0.96 (0.90-1.04) |                                       | 2,411                               | <0.001           | 0.91 (0.86-0.95) |                                       |
|                          | 65-74               | 339                              | <0.001           | 0.66 (0.51-0.83) |                                       | 927                            | 0.322            | 0.95 (0.87-1.05) |                                       | 1,266                               | 0.002            | 0.90 (0.85-0.96) |                                       |
|                          | 75-84               | 164                              | 0.131            | 0.76 (0.53-1.09) |                                       | 507                            | 0.296            | 1.07 (0.94-1.21) |                                       | 671                                 | 0.745            | 1.01 (0.93-1.11) |                                       |
|                          | 85-99               | 18                               | 0.309            | 0.56 (0.18-1.71) |                                       | 40                             | 0.096            | 1.40 (0.94-2.09) |                                       | 58                                  | 0.581            | 1.09 (0.81-1.46) |                                       |
| Intracerebral hemorrhage | 18-99               | 3,595                            | <0.001           | 0.62 (0.58-0.66) |                                       | 6,120                          | <0.001           | 0.90 (0.86-0.93) |                                       | 9,715                               | <0.001           | 0.80 (0.79-0.82) |                                       |

| CVD subtypes<br>(ICD10) | Age group,<br>Years | LDL-C < 100 mg/dL<br>(n=5,051,377) |         |                  |                                       | 100-300 mg/dL<br>(n=9,830,896) |         |                  |                                       | LDL-C ≤ 300 mg/dL<br>(n=14,882,273) |         |                  |                                       |
|-------------------------|---------------------|------------------------------------|---------|------------------|---------------------------------------|--------------------------------|---------|------------------|---------------------------------------|-------------------------------------|---------|------------------|---------------------------------------|
|                         |                     | No. of death                       | p-value | HR (95% CI)      | <i>P</i> <sub>interaction (age)</sub> | No. of death                   | p-value | HR (95% CI)      | <i>P</i> <sub>interaction (age)</sub> | No. of death                        | p-value | HR (95% CI)      | <i>P</i> <sub>interaction (age)</sub> |
|                         | 18-44               | 321                                | <0.001  | 0.61 (0.48-0.77) | <0.001                                | 453                            | 0.622   | 1.04 (0.90-1.20) | 0.356                                 | 774                                 | 0.005   | 0.88 (0.81-0.96) | <0.001                                |
|                         | 45-64               | 1,189                              | <0.001  | 0.51 (0.45-0.57) |                                       | 1,841                          | 0.005   | 0.90 (0.84-0.97) |                                       | 3,030                               | <0.001  | 0.76 (0.73-0.79) |                                       |
|                         | 65-74               | 1,218                              | <0.001  | 0.66 (0.59-0.75) |                                       | 2,112                          | <0.001  | 0.88 (0.83-0.94) |                                       | 3,330                               | <0.001  | 0.80 (0.77-0.83) |                                       |
|                         | 75-84               | 768                                | 0.035   | 0.83 (0.70-0.99) |                                       | 1,534                          | 0.001   | 0.88 (0.81-0.95) |                                       | 2,302                               | <0.001  | 0.85 (0.81-0.89) |                                       |
|                         | 85-99               | 99                                 | 0.373   | 0.80 (0.49-1.31) |                                       | 180                            | 0.441   | 0.91 (0.73-1.15) |                                       | 279                                 | 0.077   | 0.88 (0.76-1.01) |                                       |
| Ischemic stroke         | 18-99               | 3,403                              | <0.001  | 0.86 (0.79-0.93) |                                       | 8,439                          | <0.001  | 1.11 (1.07-1.14) |                                       | 11,842                              | <0.001  | 1.05 (1.03-1.07) |                                       |
|                         | 18-44               | 40                                 | 0.133   | 0.60 (0.31-1.17) | 0.470                                 | 105                            | 0.045   | 1.31 (1.01-1.70) | 0.011                                 | 145                                 | 0.021   | 1.24 (1.03-1.48) | 0.040                                 |
|                         | 45-64               | 469                                | 0.282   | 0.90 (0.73-1.09) |                                       | 1,132                          | 0.022   | 1.10 (1.01-1.20) |                                       | 1,601                               | 0.042   | 1.06 (1.00-1.12) |                                       |
|                         | 65-74               | 1,317                              | 0.137   | 0.91 (0.80-1.03) |                                       | 3,200                          | <0.001  | 1.17 (1.11-1.23) |                                       | 4,517                               | <0.001  | 1.09 (1.05-1.12) |                                       |
|                         | 75-84               | 1,300                              | 0.022   | 0.86 (0.75-0.98) |                                       | 3,334                          | 0.007   | 1.07 (1.02-1.12) |                                       | 4,634                               | 0.079   | 1.03 (1.00-1.07) |                                       |
|                         | 85-99               | 277                                | 0.023   | 0.72 (0.54-0.96) |                                       | 668                            | 0.634   | 0.97 (0.87-1.09) |                                       | 945                                 | 0.900   | 1.00 (0.92-1.07) |                                       |
| Heart failure           | 18-99               | 1,920                              | <0.001  | 0.71 (0.64-0.79) |                                       | 4,054                          | 0.034   | 1.05 (1.00-1.10) |                                       | 5,974                               | <0.001  | 0.93 (0.90-0.96) |                                       |
|                         | 18-44               | 33                                 | 0.032   | 0.45 (0.22-0.94) | 0.399                                 | 38                             | 0.071   | 1.48 (0.97-2.28) | 0.043                                 | 71                                  | 0.351   | 0.87 (0.66-1.16) | 0.109                                 |
|                         | 45-64               | 222                                | <0.001  | 0.60 (0.45-0.79) |                                       | 403                            | 0.427   | 1.06 (0.92-1.22) |                                       | 625                                 | 0.032   | 0.91 (0.83-0.99) |                                       |
|                         | 65-74               | 569                                | 0.003   | 0.75 (0.63-0.91) |                                       | 1,253                          | 0.011   | 1.11 (1.02-1.20) |                                       | 1,822                               | 0.431   | 0.98 (0.93-1.03) |                                       |
|                         | 75-84               | 837                                | <0.001  | 0.72 (0.61-0.85) |                                       | 1,879                          | 0.176   | 1.05 (0.98-1.12) |                                       | 2,716                               | 0.004   | 0.94 (0.90-0.98) |                                       |
|                         | 85-99               | 259                                | 0.173   | 0.80 (0.59-1.10) |                                       | 481                            | 0.093   | 0.89 (0.77-1.02) |                                       | 740                                 | <0.001  | 0.85 (0.78-0.93) |                                       |
| Sudden cardiac death    | 18-99               | 2,618                              | <0.001  | 0.81 (0.74-0.88) |                                       | 5,554                          | <0.001  | 1.13 (1.08-1.17) |                                       | 8,172                               | 0.389   | 1.01 (0.99-1.04) |                                       |
|                         | 18-44               | 303                                | 0.028   | 0.76 (0.59-0.97) | 0.523                                 | 522                            | 0.009   | 1.19 (1.04-1.35) | 0.011                                 | 825                                 | 0.200   | 1.05 (0.97-1.14) | 0.177                                 |
|                         | 45-64               | 848                                | <0.001  | 0.76 (0.66-0.87) |                                       | 1,773                          | <0.001  | 1.22 (1.14-1.30) |                                       | 2,621                               | 0.094   | 1.04 (0.99-1.08) |                                       |
|                         | 65-74               | 839                                | 0.019   | 0.83 (0.71-0.97) |                                       | 1,853                          | 0.012   | 1.09 (1.02-1.17) |                                       | 2,692                               | 0.931   | 1.00 (0.96-1.04) |                                       |
|                         | 75-84               | 529                                | 0.421   | 0.92 (0.75-1.13) |                                       | 1,209                          | 0.445   | 1.03 (0.95-1.12) |                                       | 1,738                               | 0.249   | 0.97 (0.92-1.02) |                                       |

| CVD subtypes<br>(ICD10) | Age group, | LDL-C < 100 mg/dL<br>(n=5,051,377) |         |                  |                                       | 100-300 mg/dL<br>(n=9,830,896) |         |                  |                                       | LDL-C ≤ 300 mg/dL<br>(n=14,882,273) |         |                  |                                       |
|-------------------------|------------|------------------------------------|---------|------------------|---------------------------------------|--------------------------------|---------|------------------|---------------------------------------|-------------------------------------|---------|------------------|---------------------------------------|
|                         | Years      | No. of death                       | p-value | HR (95% CI)      | <i>P</i> <sub>interaction (age)</sub> | No. of death                   | p-value | HR (95% CI)      | <i>P</i> <sub>interaction (age)</sub> | No. of death                        | p-value | HR (95% CI)      | <i>P</i> <sub>interaction (age)</sub> |
|                         | 85-99      | 99                                 | 0.958   | 0.99 (0.59-1.66) |                                       | 197                            | 0.712   | 0.96 (0.77-1.19) |                                       | 296                                 | 0.340   | 0.94 (0.82-1.07) |                                       |

CI, confidence interval; HR, hazard ratio; LDL-C, low density lipoprotein-cholesterol;

<sup>a</sup> HRs were calculated by Cox models, after adjustment for age at baseline, sex, smoking status, alcohol use, physical activity, household income, body mass index, systolic blood pressure, fasting glucose, triglyceride, and high density lipoprotein-cholesterol.

To convert LDL-C from mg/dL to mmol/L, multiply by 0.02586

**Table S6. HRs<sup>a</sup> per each 39 mg/dL (1 mmol/L) increase in LDL-C for deaths from CVD and subtypes in the LDL-C range 130-300 mg/dL**

| LDL-C range          | CVD subtypes             | Total        |         |                  | Men          |         |                  | <i>P</i> <sub>interaction (sex)</sub> | Women        |         |                  |
|----------------------|--------------------------|--------------|---------|------------------|--------------|---------|------------------|---------------------------------------|--------------|---------|------------------|
|                      |                          | No. of death | p-value | HR (95% CI)      | No. of death | p-value | HR (95% CI)      |                                       | No. of death | p-value | HR (95% CI)      |
| LDL-C 130-300 mg/dL  |                          |              |         |                  |              |         |                  |                                       |              |         |                  |
| 2.59-7.76 mmol/L     | CVD                      | 33,964       | <0.001  | 1.16 (1.14-1.18) | 17,395       | <0.001  | 1.26 (1.22-1.29) | <0.001                                | 16,569       | <0.001  | 1.08 (1.06-1.11) |
| (Total, n=4,493,077) | Hypertension             | 2,452        | 0.113   | 1.06 (0.99-1.13) | 869          | 0.003   | 1.20 (1.06-1.35) | 0.012                                 | 1,583        | 0.966   | 1.00 (0.92-1.08) |
|                      | Ischemic heart disease   | 9,822        | <0.001  | 1.30 (1.26-1.35) | 5,983        | <0.001  | 1.36 (1.31-1.42) | <0.001                                | 3,839        | <0.001  | 1.22 (1.17-1.28) |
|                      | Myocardial infarction    | 7,455        | <0.001  | 1.31 (1.26-1.36) | 4,551        | <0.001  | 1.36 (1.30-1.43) | 0.008                                 | 2,904        | <0.001  | 1.23 (1.17-1.30) |
|                      | Stroke                   | 12,952       | <0.001  | 1.07 (1.04-1.10) | 6,054        | <0.001  | 1.15 (1.10-1.20) | <0.001                                | 6,898        | 0.285   | 1.02 (0.98-1.06) |
|                      | Hemorrhagic stroke       | 4,740        | 0.886   | 1.00 (0.95-1.05) | 2,069        | 0.277   | 1.05 (0.96-1.13) | 0.123                                 | 2,671        | 0.266   | 0.96 (0.90-1.03) |
|                      | Subarachnoid hemorrhage  | 1,923        | 0.936   | 1.00 (0.93-1.09) | 666          | 0.659   | 0.97 (0.84-1.12) | 0.654                                 | 1,257        | 0.887   | 1.01 (0.92-1.11) |
|                      | Intracerebral hemorrhage | 2,817        | 0.972   | 1.00 (0.94-1.07) | 1,403        | 0.095   | 1.09 (0.99-1.20) | 0.022                                 | 1,414        | 0.114   | 0.93 (0.85-1.02) |
|                      | Ischemic stroke          | 4,423        | <0.001  | 1.13 (1.08-1.19) | 2,188        | <0.001  | 1.20 (1.11-1.29) | 0.054                                 | 2,235        | 0.016   | 1.08 (1.02-1.16) |
|                      | Heart failure            | 2,050        | <0.001  | 1.18 (1.10-1.27) | 738          | <0.001  | 1.30 (1.15-1.47) | 0.089                                 | 1,312        | 0.003   | 1.14 (1.05-1.24) |
|                      | Sudden cardiac death     | 2,867        | <0.001  | 1.16 (1.09-1.23) | 1,745        | <0.001  | 1.25 (1.16-1.36) | 0.003                                 | 1,122        | 0.475   | 1.04 (0.94-1.14) |

CI, confidence interval; HR, hazard ratio; LDL-C, low density lipoprotein-cholesterol;

<sup>a</sup> HRs were calculated by Cox models, after adjustment for age at baseline, sex, smoking status, alcohol use, physical activity, household income, body mass index, systolic blood pressure, fasting glucose, triglyceride, and high density lipoprotein-cholesterol.

To convert LDL-C from mg/dL to mmol/L, multiply by 0.02586
